# Supplementary material for: 3β-O-Tigloylmelianol from Guarea kunthiana: A New Potential Agent to Control Rhipicephalus (Boophilus) microplus, a Cattle Tick of Veterinary Significance
Source: PubMed Central journal article supplement (PMC6272232; doi:10.3390/molecules20010111), 2014-12-23
Supplement: molecules-20-00111-s001.pdf [file molecules-20-00111-s001.pdf]

# Supplementary Materials

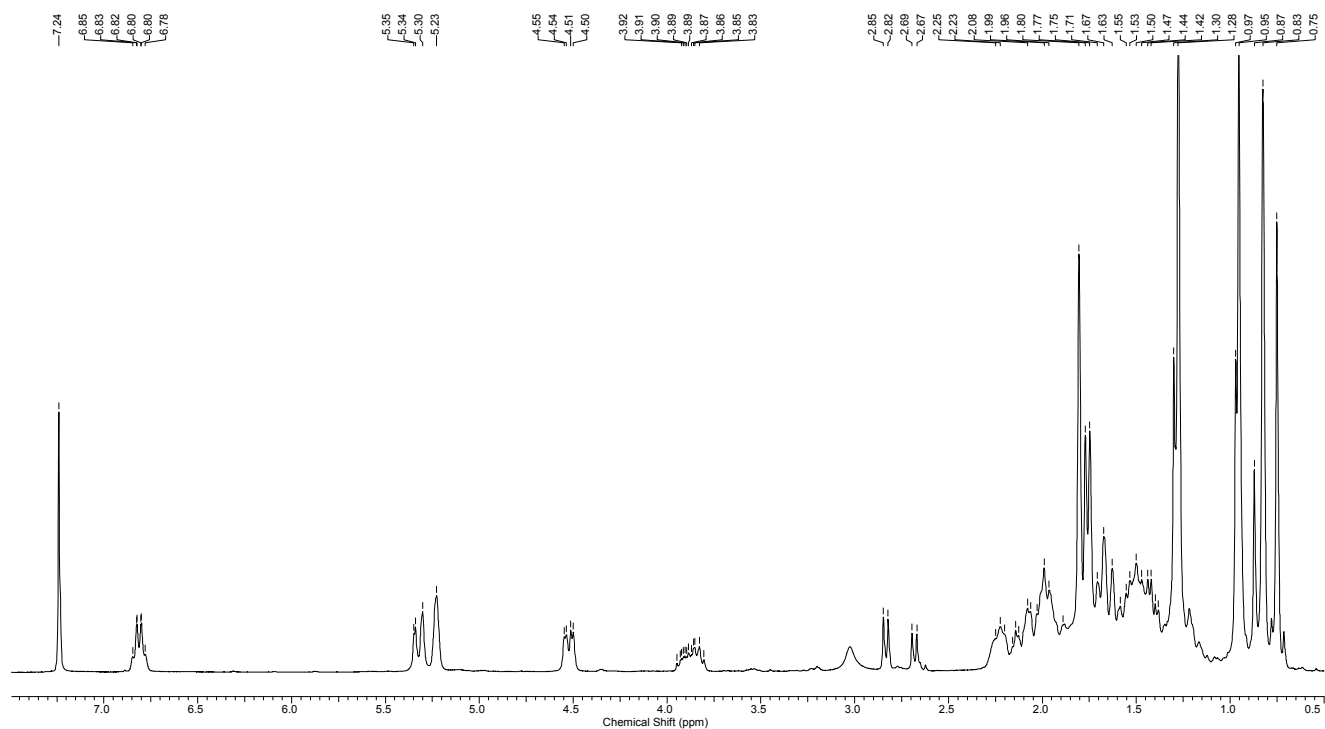

Figure S1.  $^1\text{H}$ -NMR spectrum (300 MHz,  $\text{CDCl}_3$ ) of **1**.

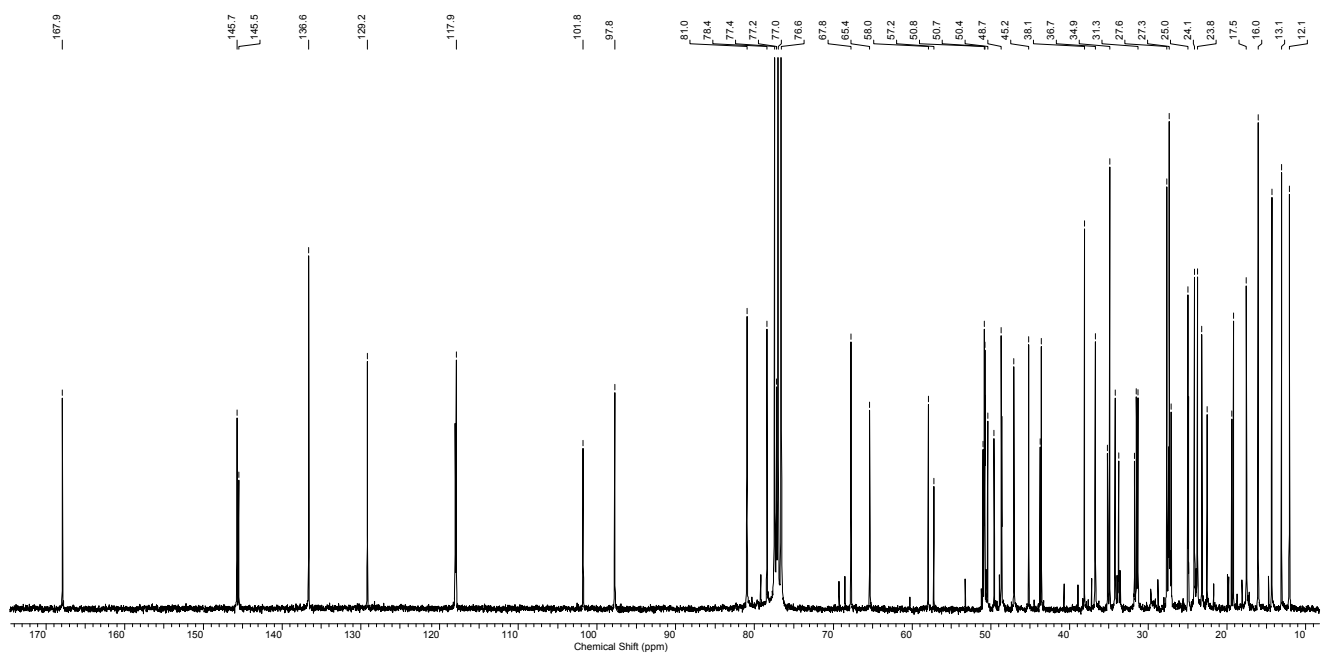

Figure S2.  $^{13}\text{C}$ -NMR spectrum (75 MHz,  $\text{CDCl}_3$ ) of **1**.

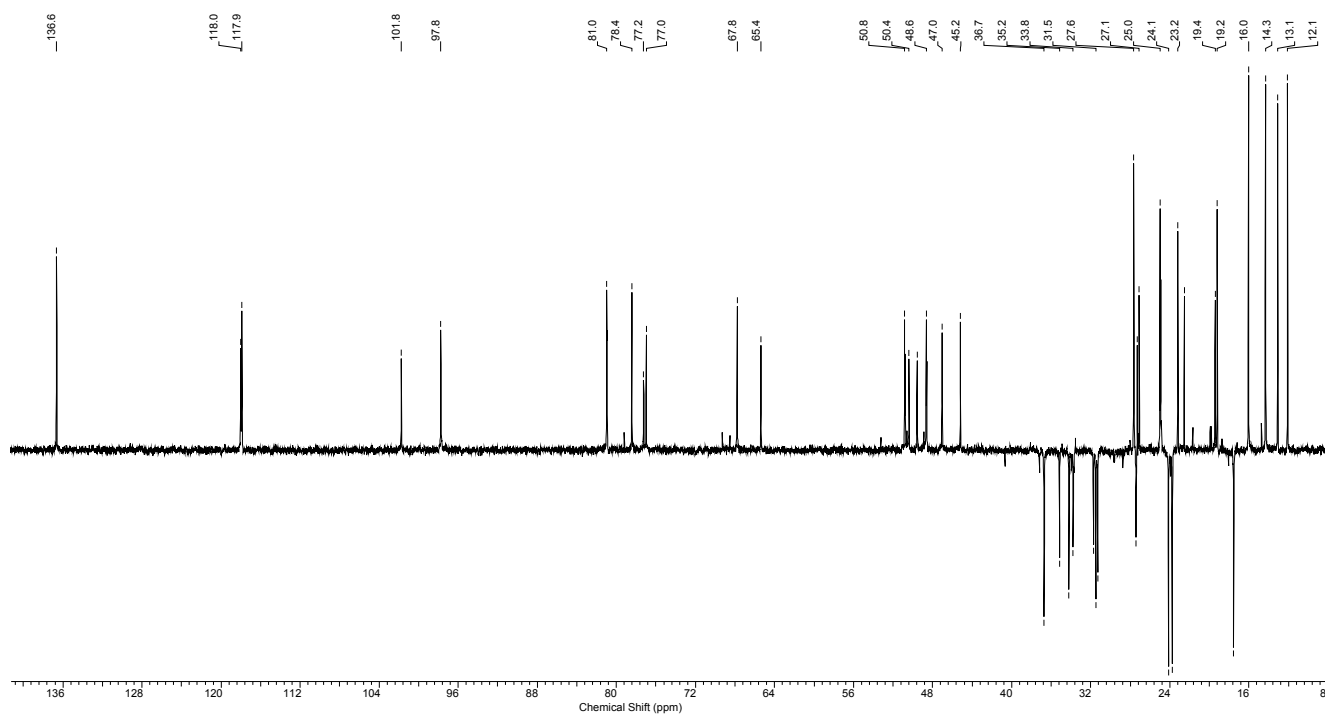

Figure S3. NMR DEPT 135 spectrum (75 MHz,  $\text{CDCl}_3$ ) of **1**.

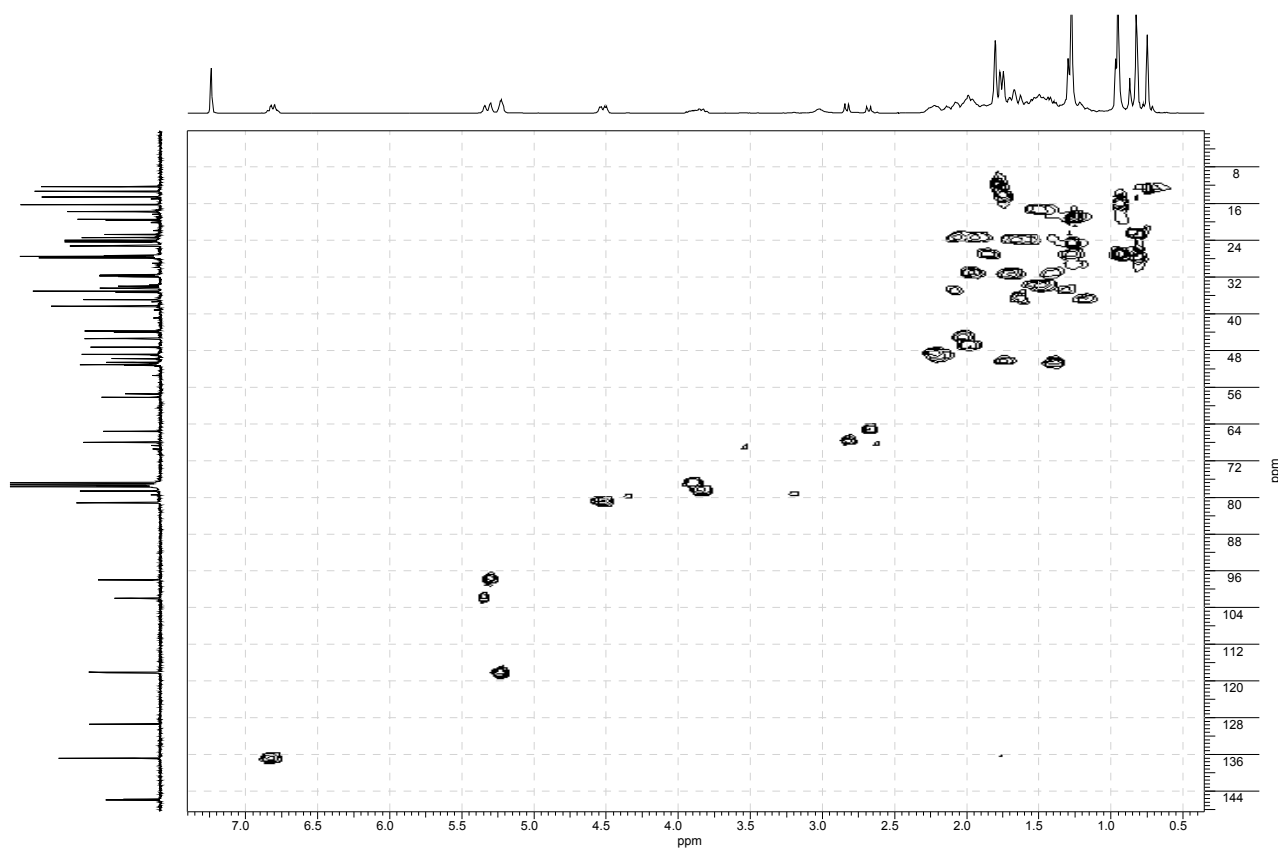

Figure S4. HSQC (300/75 MHz,  $\text{CDCl}_3$ ) of **1**.

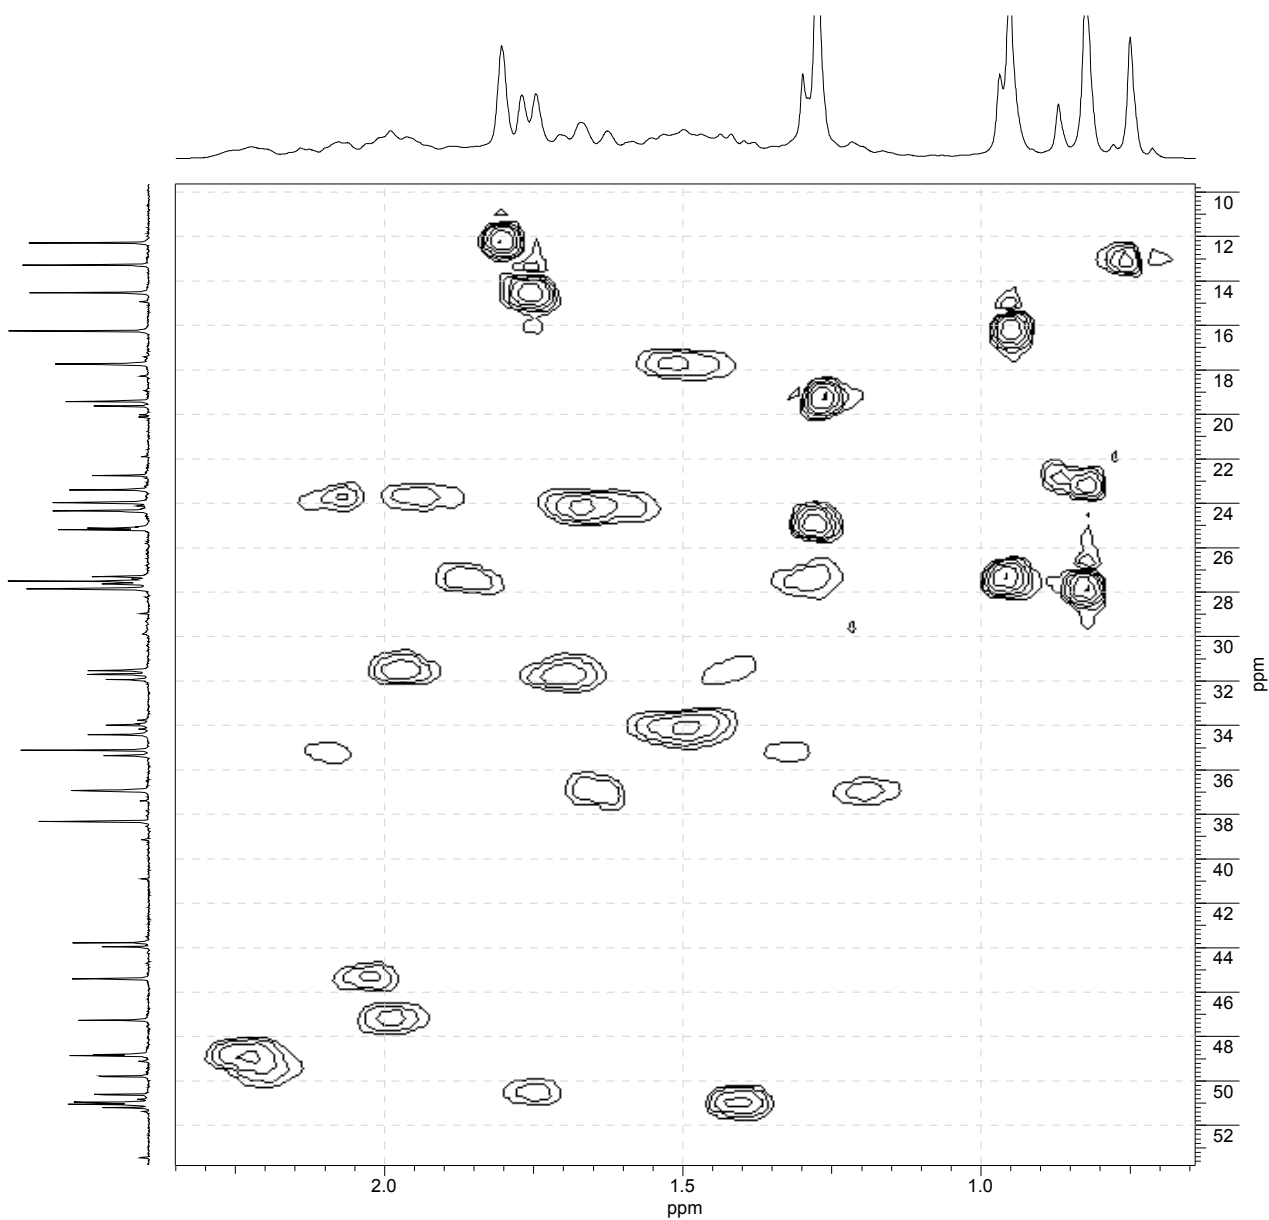

**Figure S5.** HSQC (300/75 MHz, CDCl<sub>3</sub>) [Expansion] of **1**.

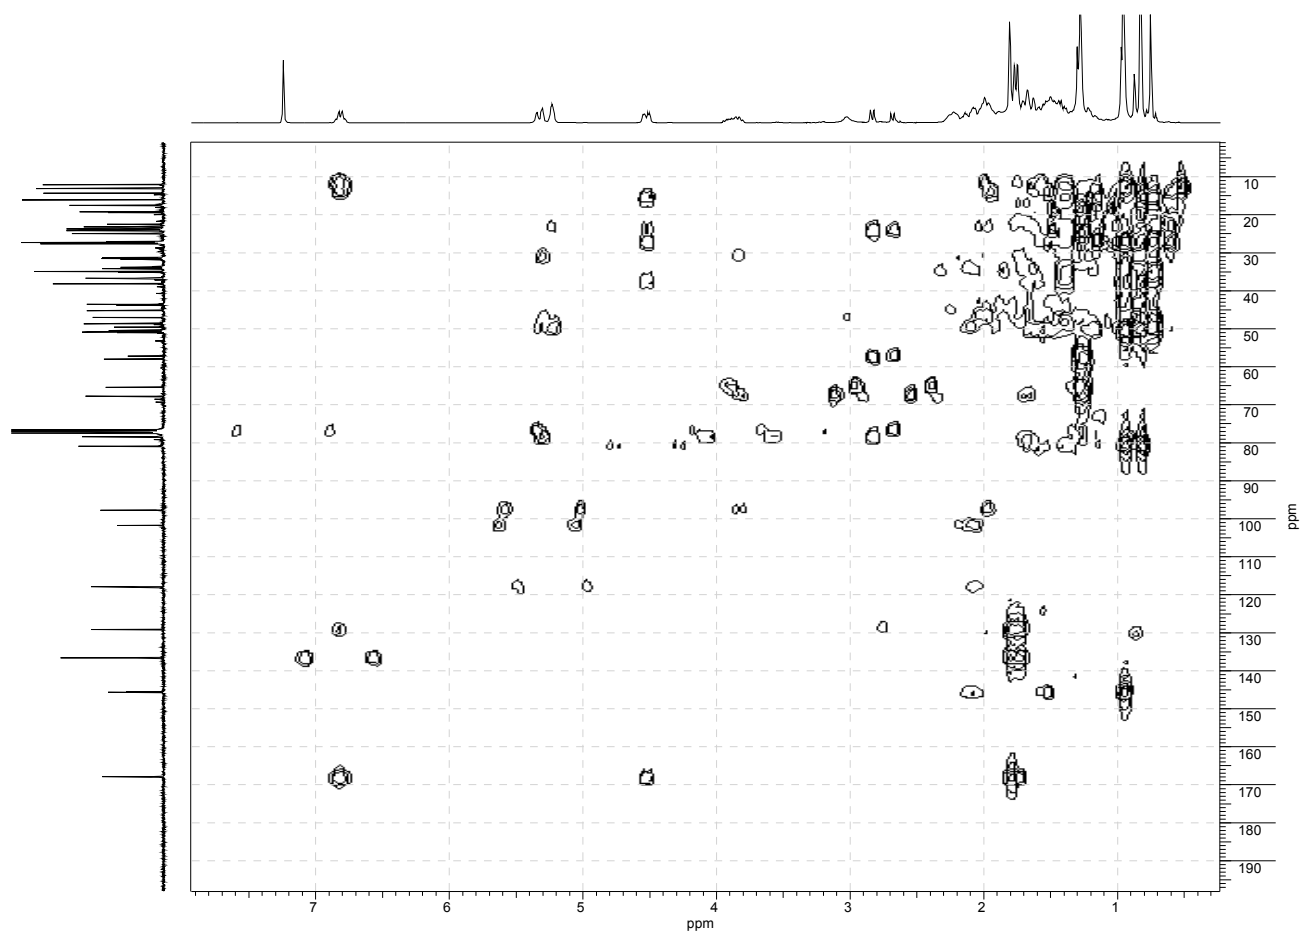

**Figure S6.** HMBC (300/75 MHz,  $\text{CDCl}_3$ ) of **1**.

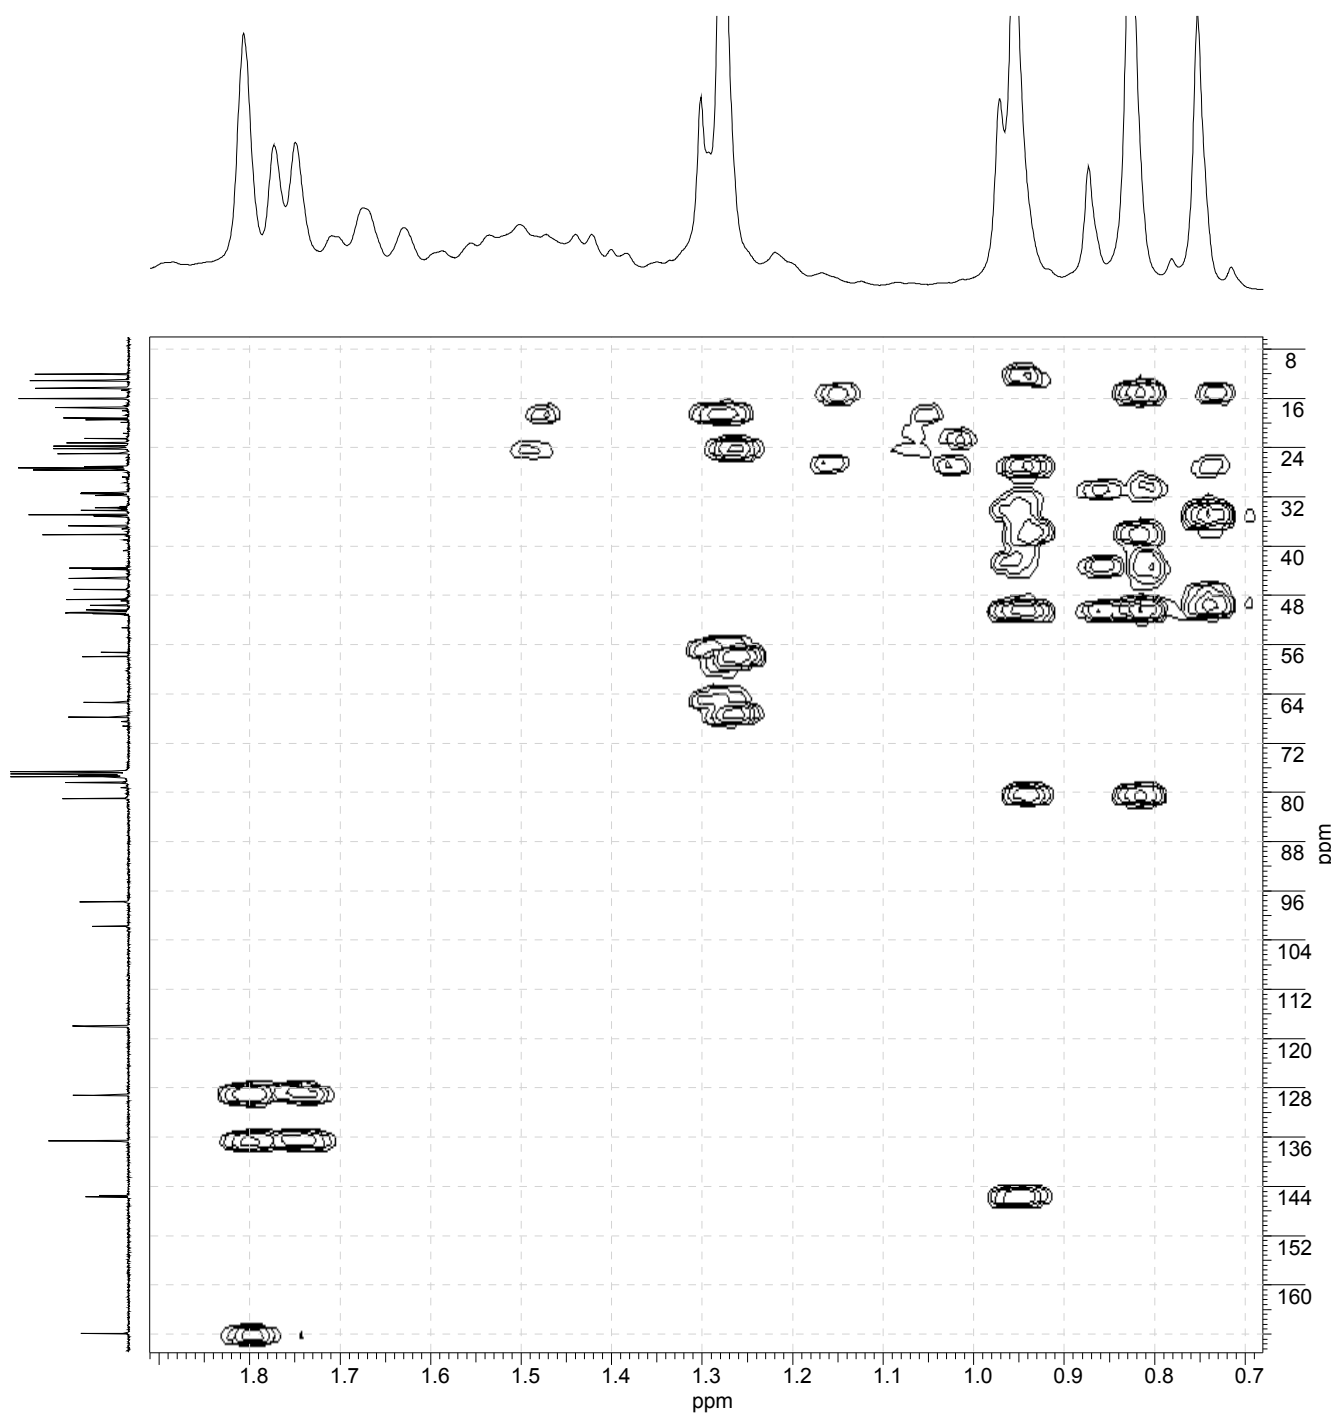

Figure S7. HMBC (300/75 MHz, CDCl<sub>3</sub>) [Expansion] of **1**.

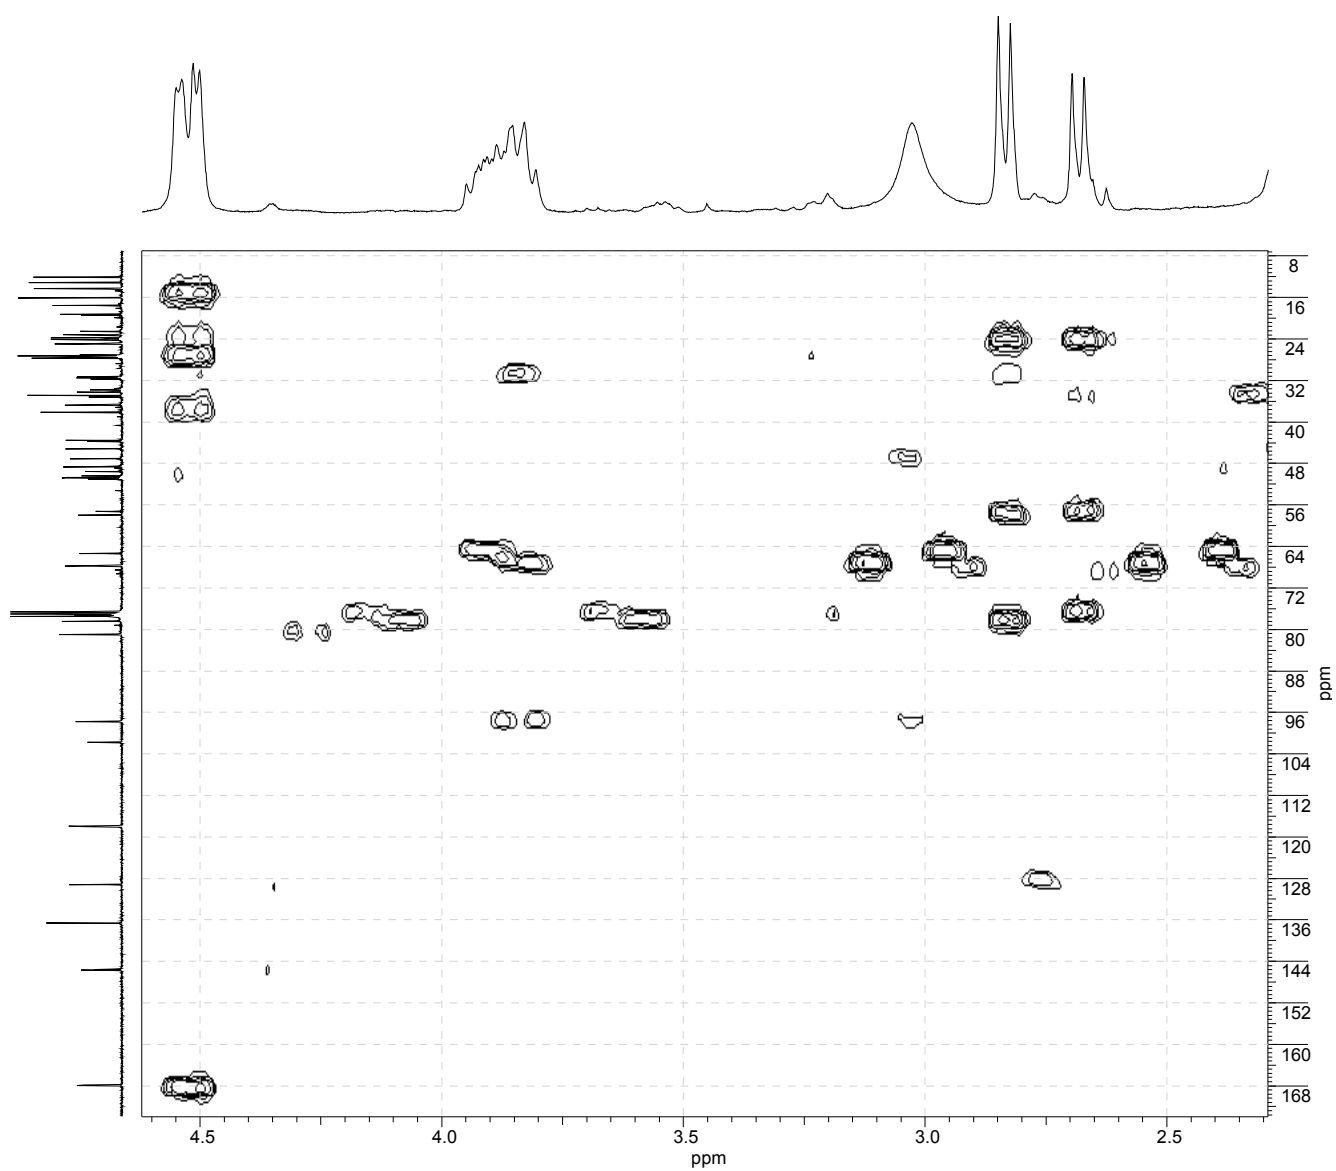

**Figure S8.** HMBC (300/75 MHz, CDCl<sub>3</sub>) [Expansion] of **1**.

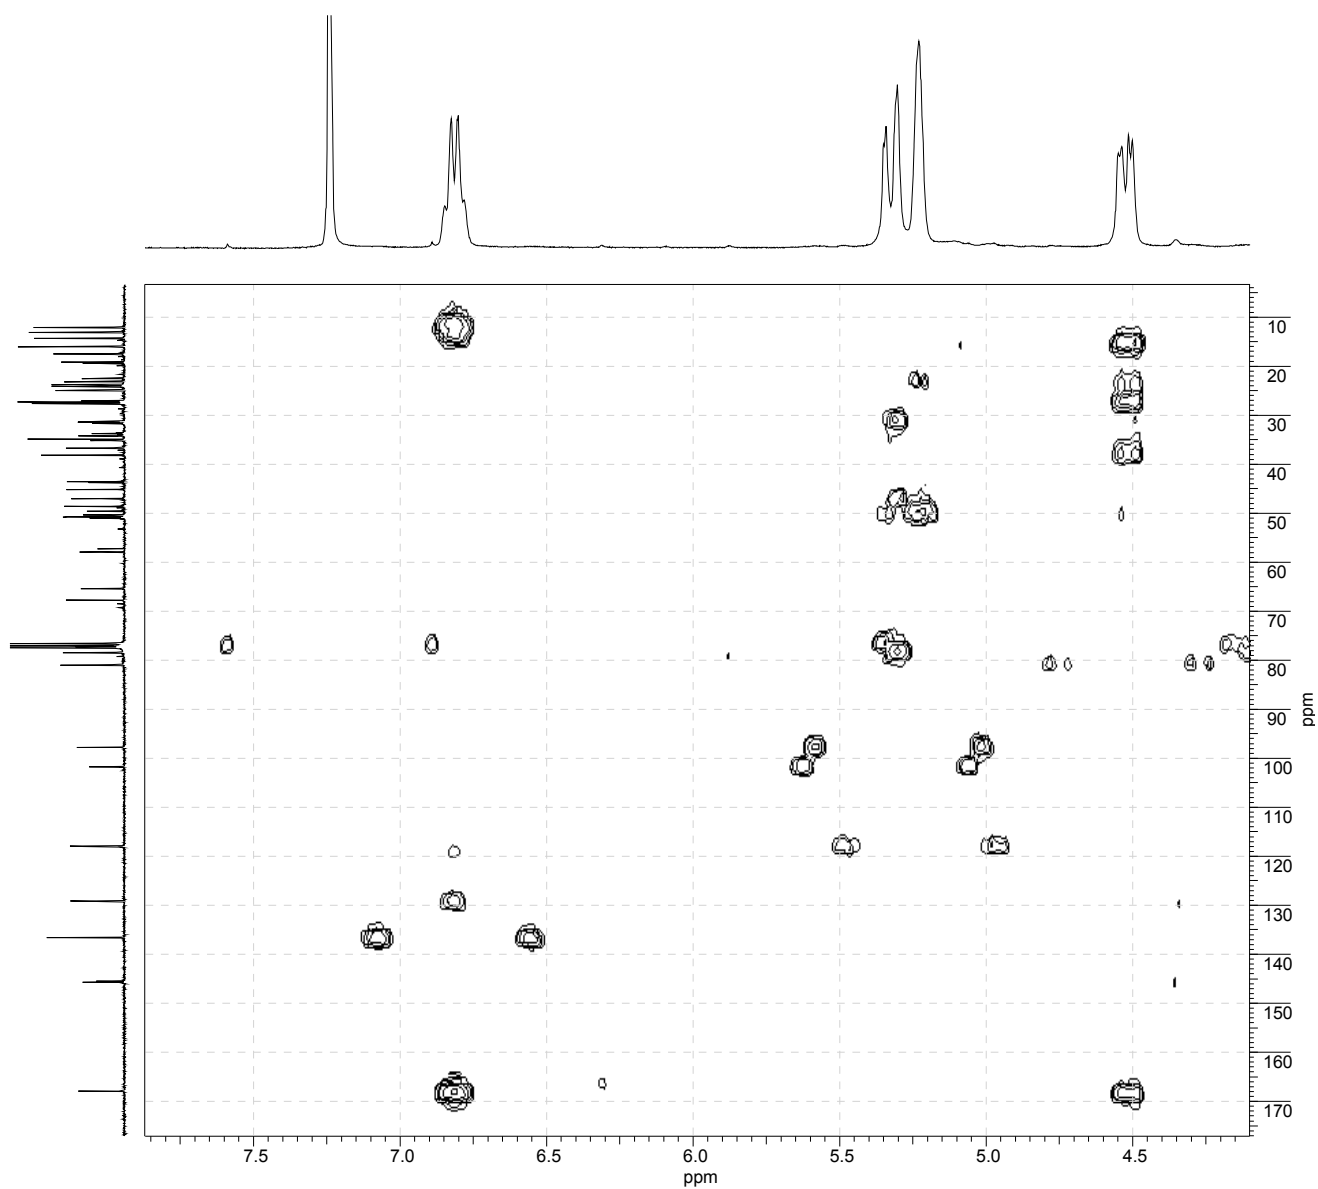

**Figure S9.** HMBC (300/75 MHz, CDCl<sub>3</sub>) [Expansion] of **1**.

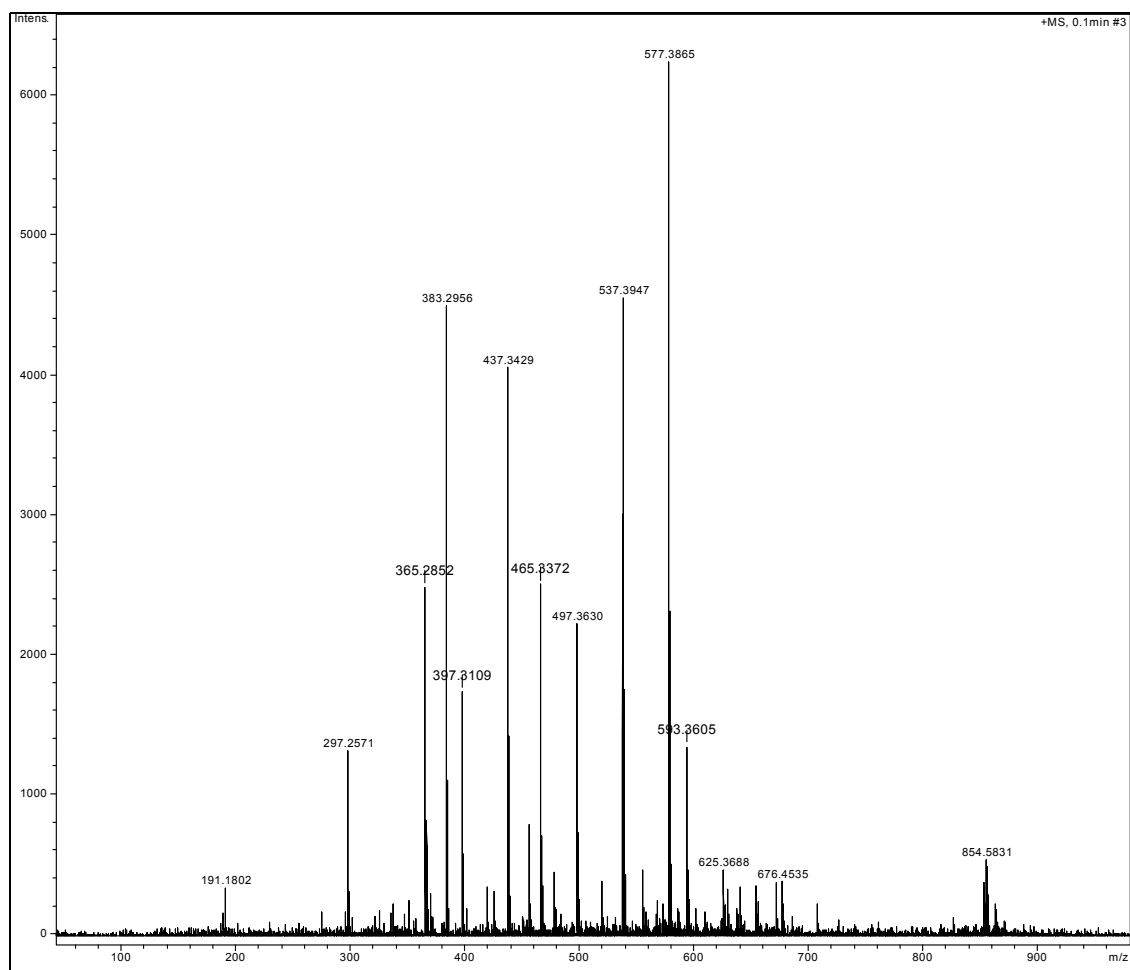

**Figure S10.** HRESIMS spectrum (positive mode) of **1**.



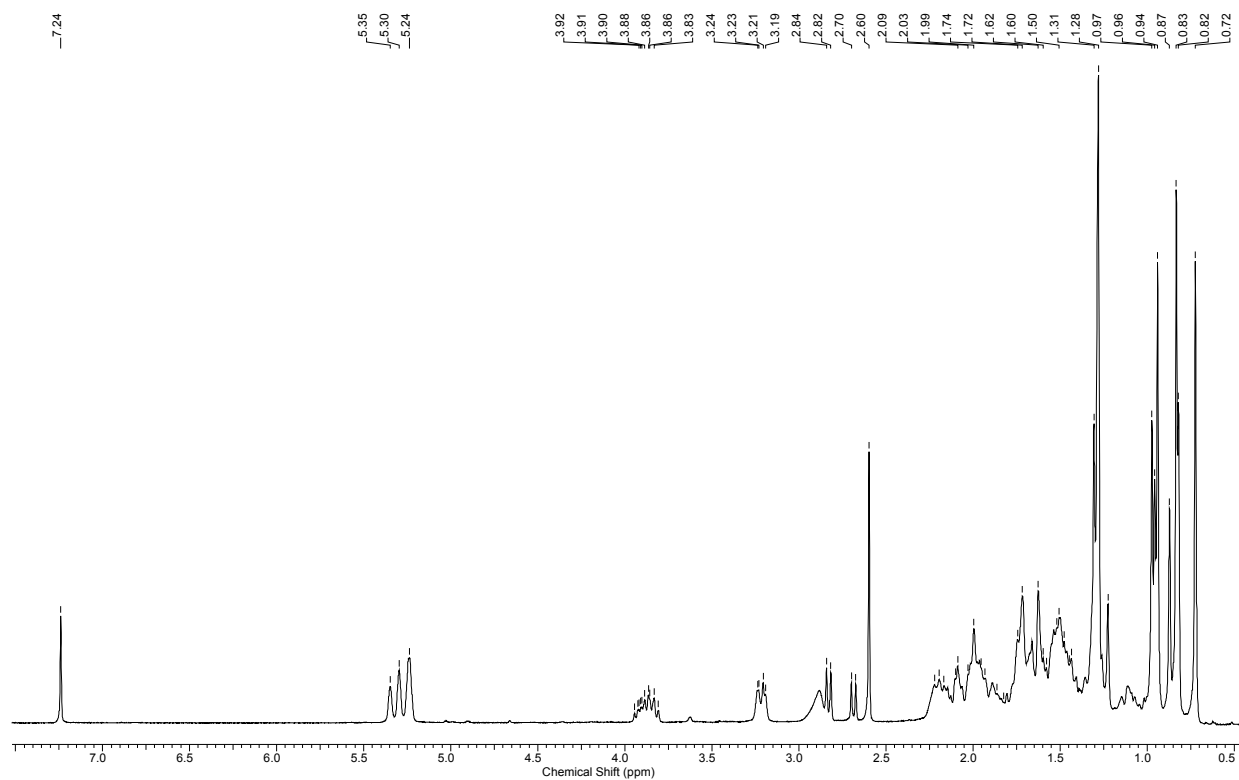

Figure S11.  $^1\text{H-NMR}$  spectrum (300 MHz,  $\text{CDCl}_3$ ) of **2**.

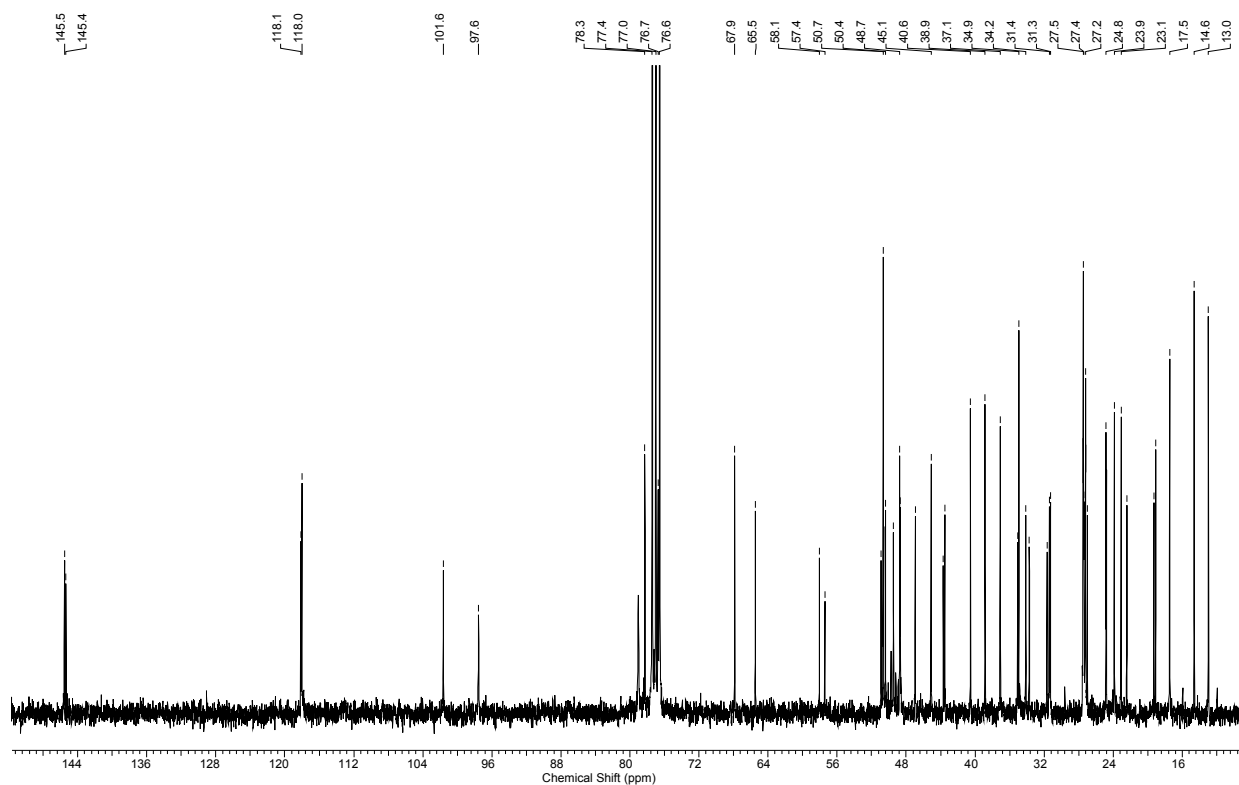

Figure S12.  $^{13}\text{C-NMR}$  spectrum (75 MHz,  $\text{CDCl}_3$ ) of **2**.

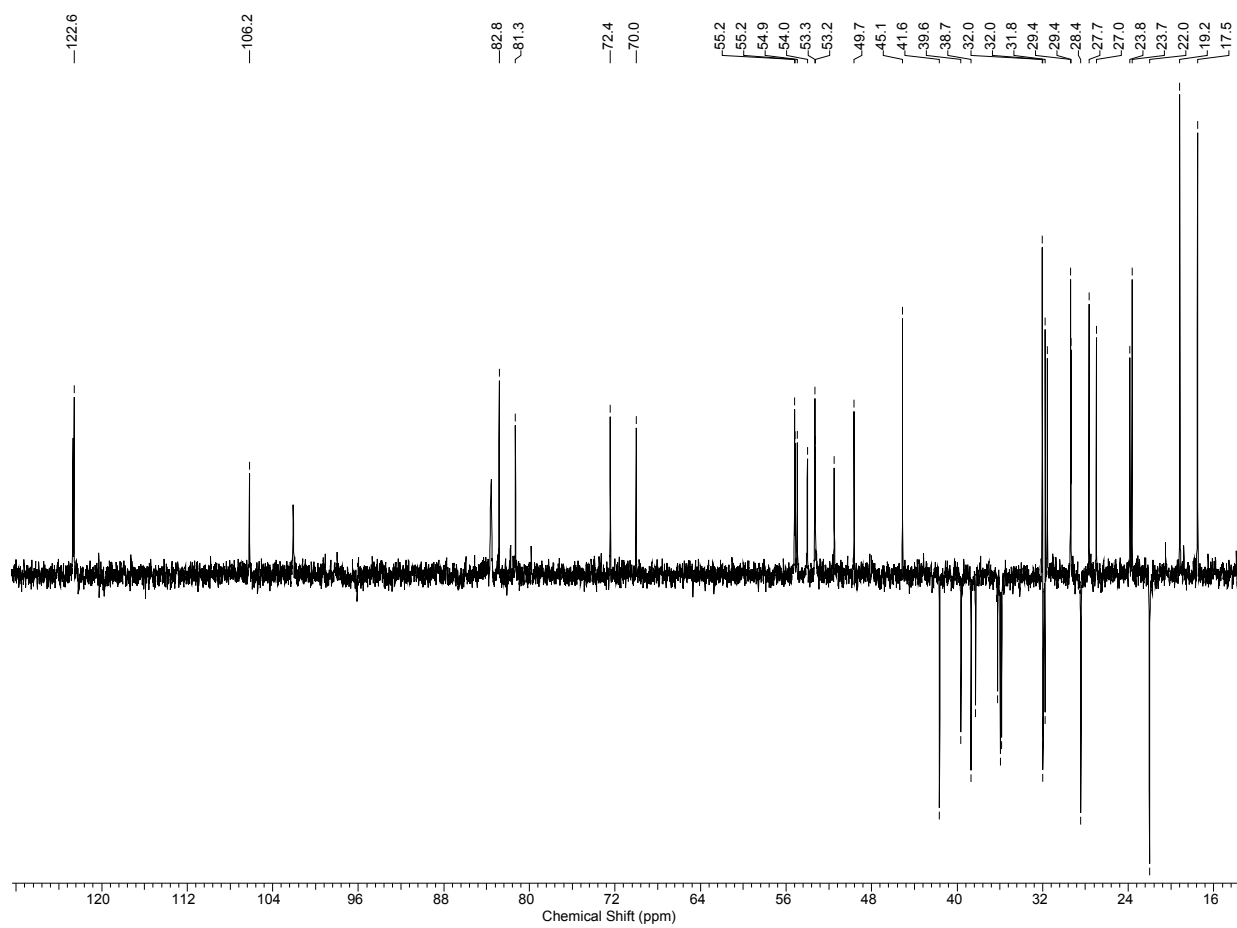

Figure S13. NMR DEPT 135 spectrum (75 MHz,  $\text{CDCl}_3$ ) of **2**.

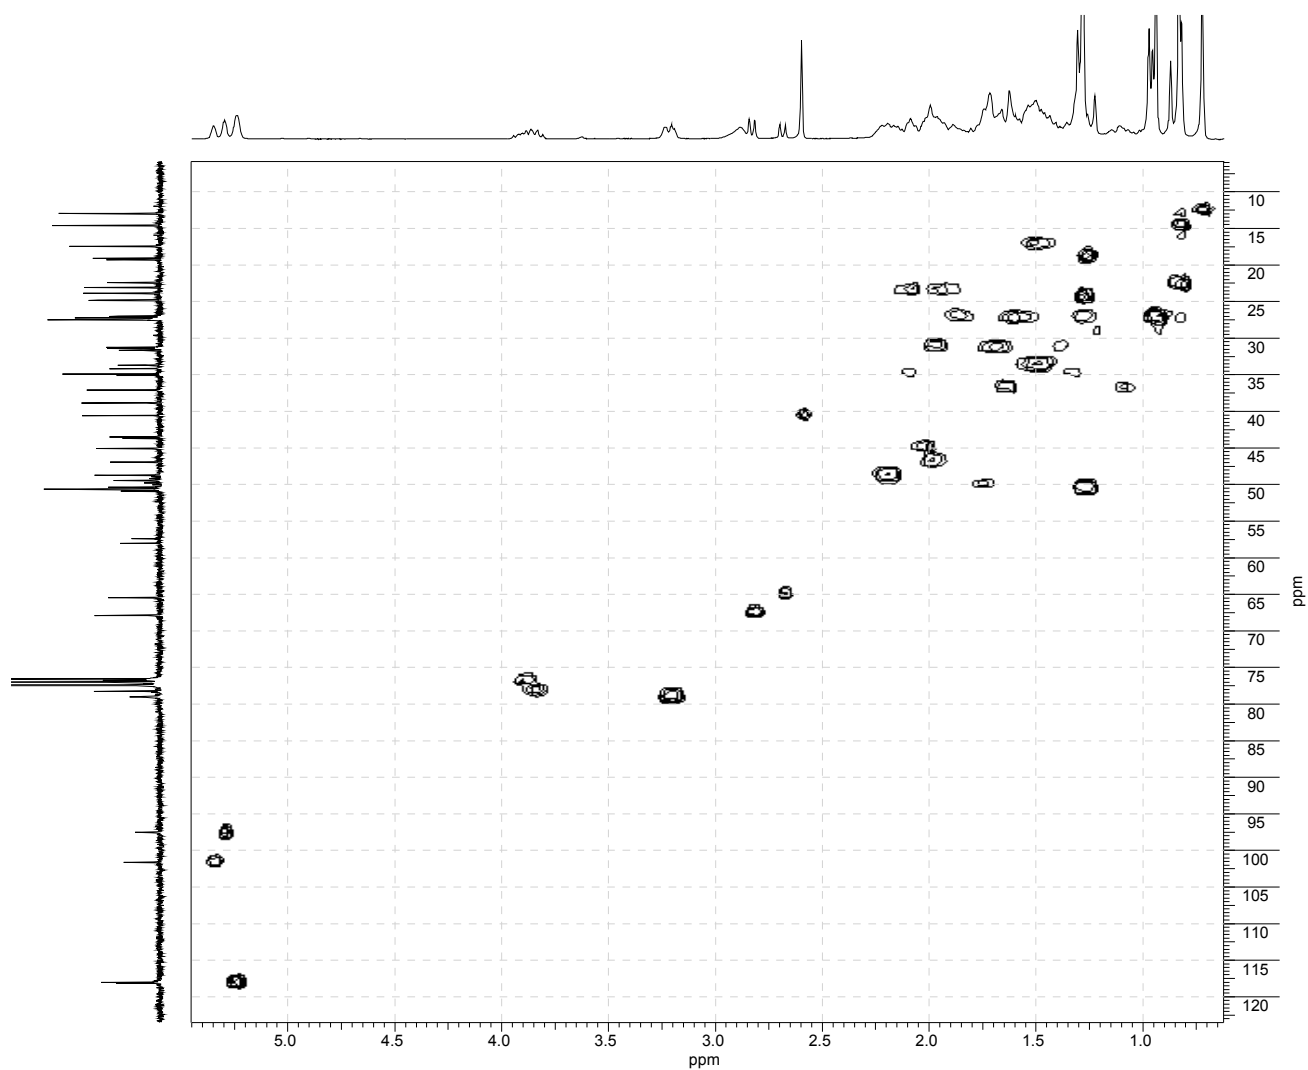

Figure S14. HSQC (300/75 MHz,  $\text{CDCl}_3$ ) of 2.

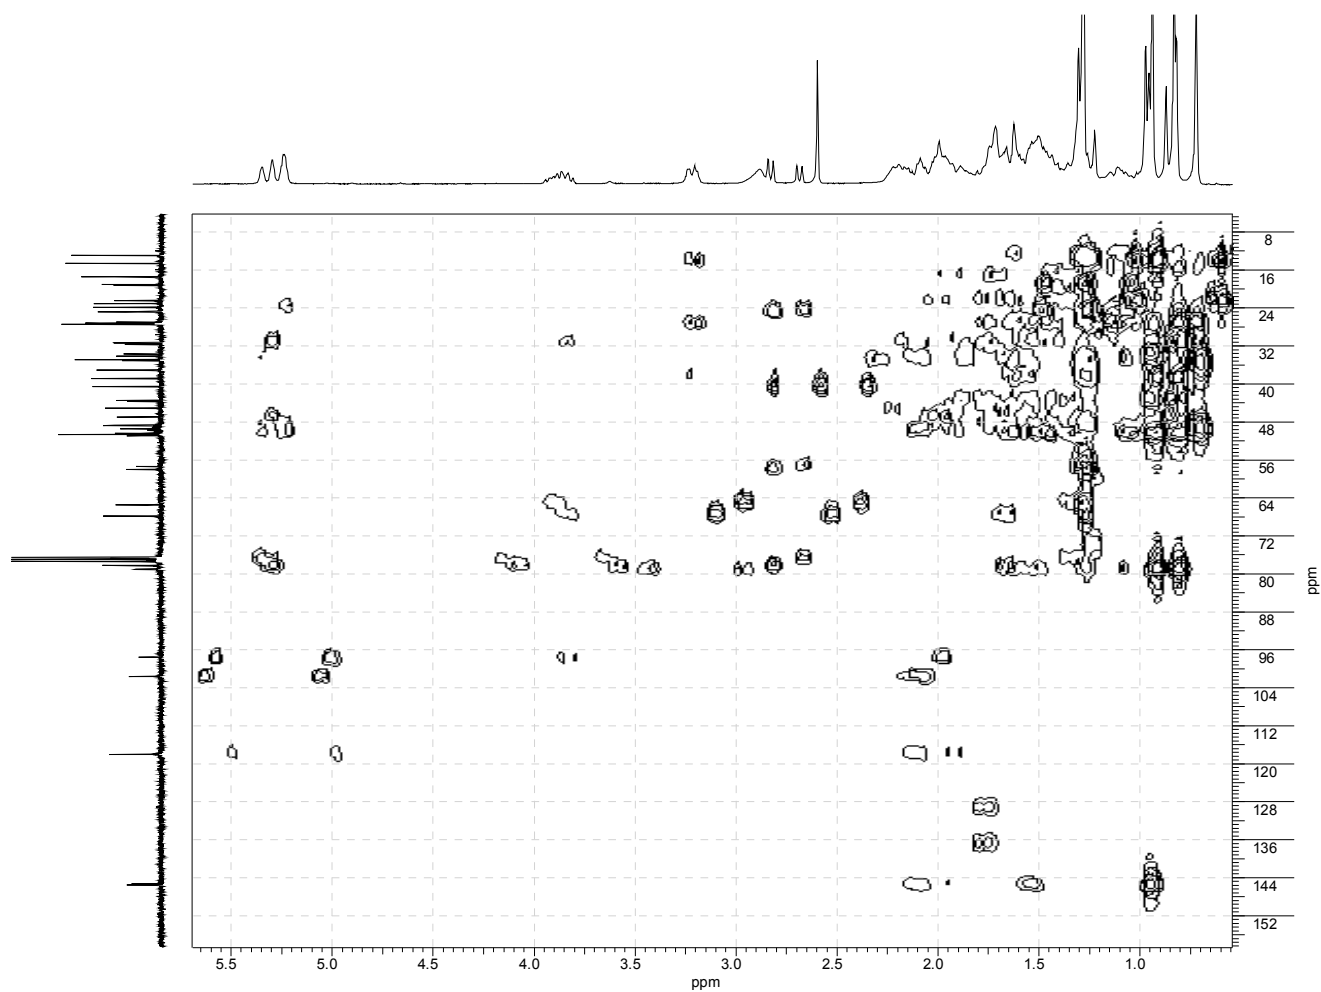

Figure S15. HMBC (300/75 MHz, CDCl<sub>3</sub>) of 2.

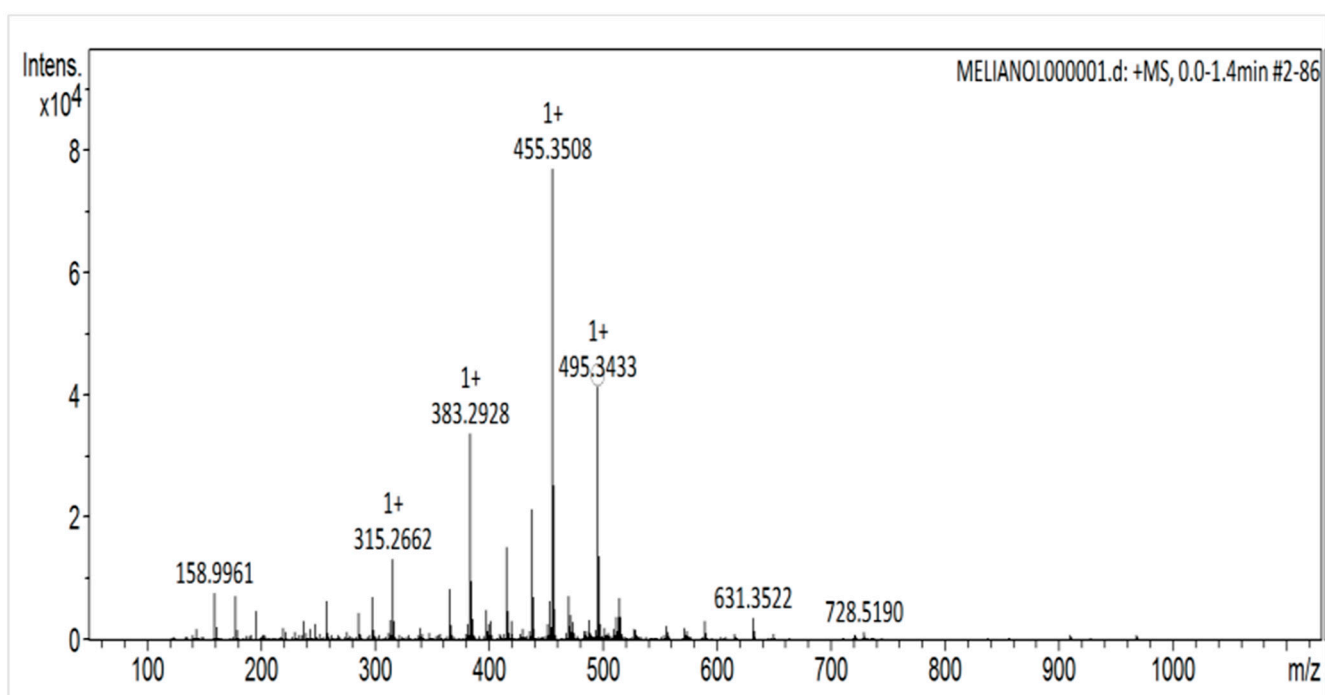

Figure S16. HRESIMS spectrum (positive mode) of 2.

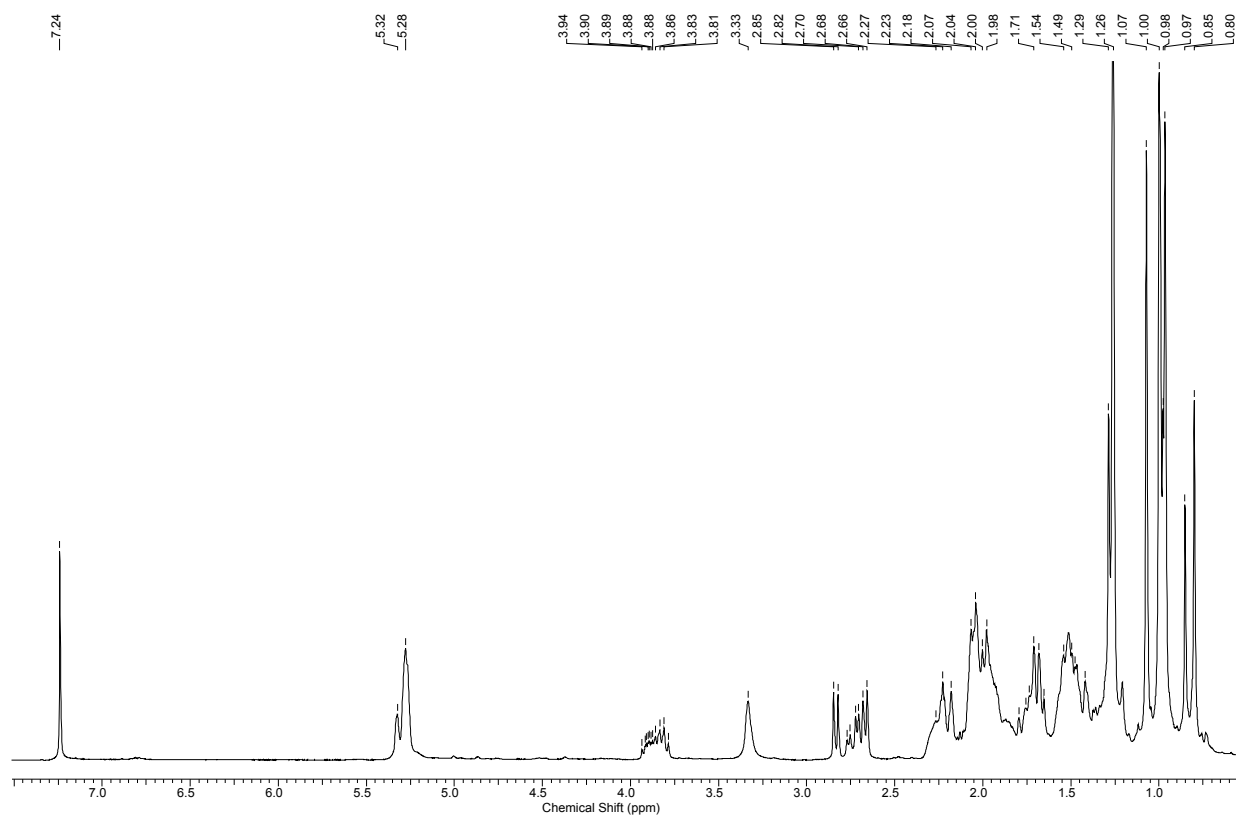

Figure S17.  $^1\text{H}$ -NMR spectrum (300 MHz,  $\text{CDCl}_3$ ) of **3**.

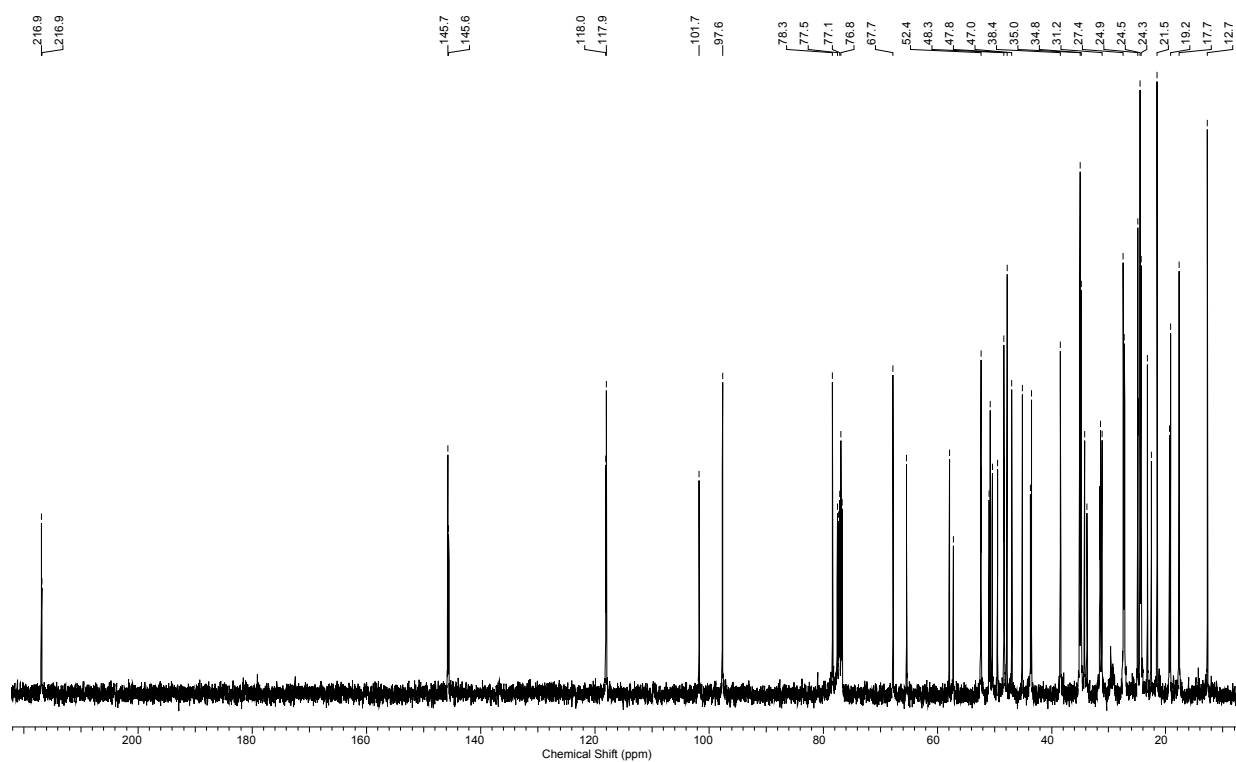

Figure S18.  $^{13}\text{C}$ -NMR spectrum (75 MHz,  $\text{CDCl}_3$ ) of **3**.

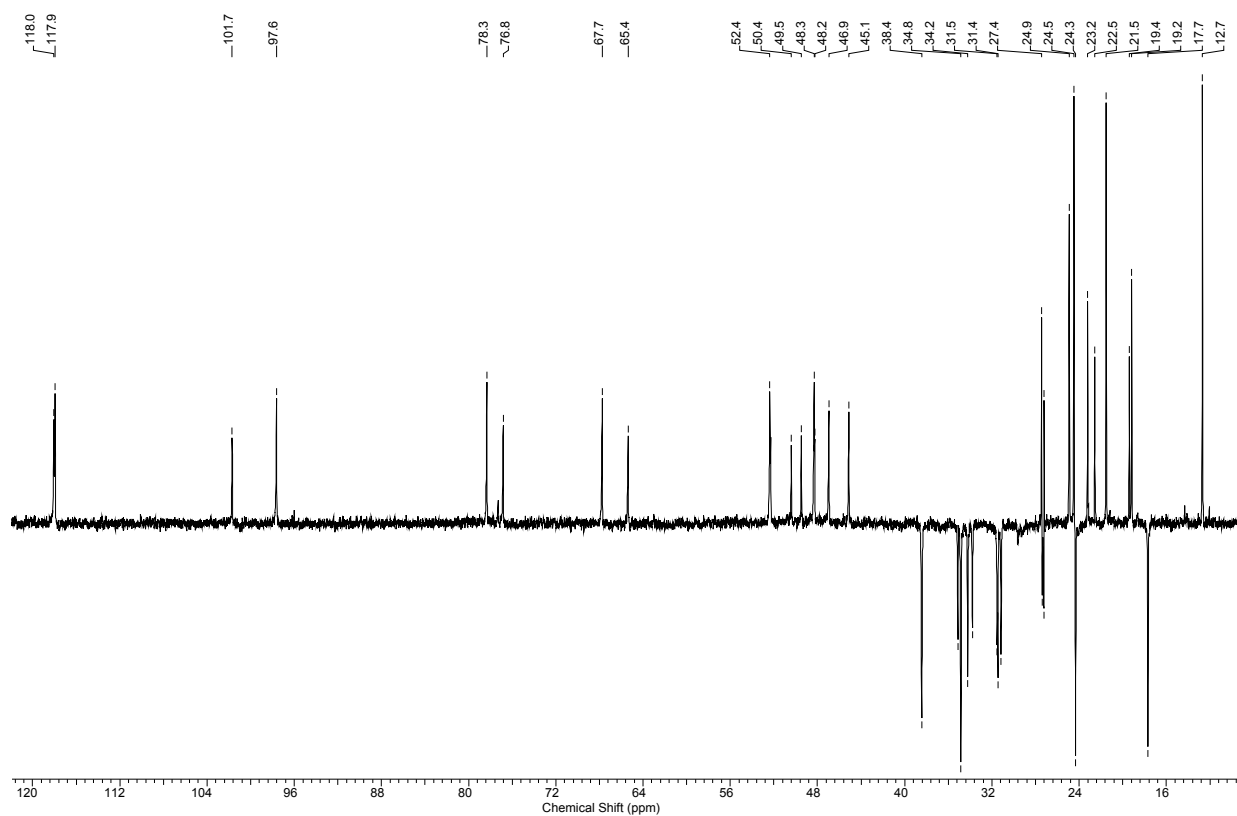

**Figure S19.** NMR DEPT 135 spectrum (75 MHz,  $\text{CDCl}_3$ ) of **3**.

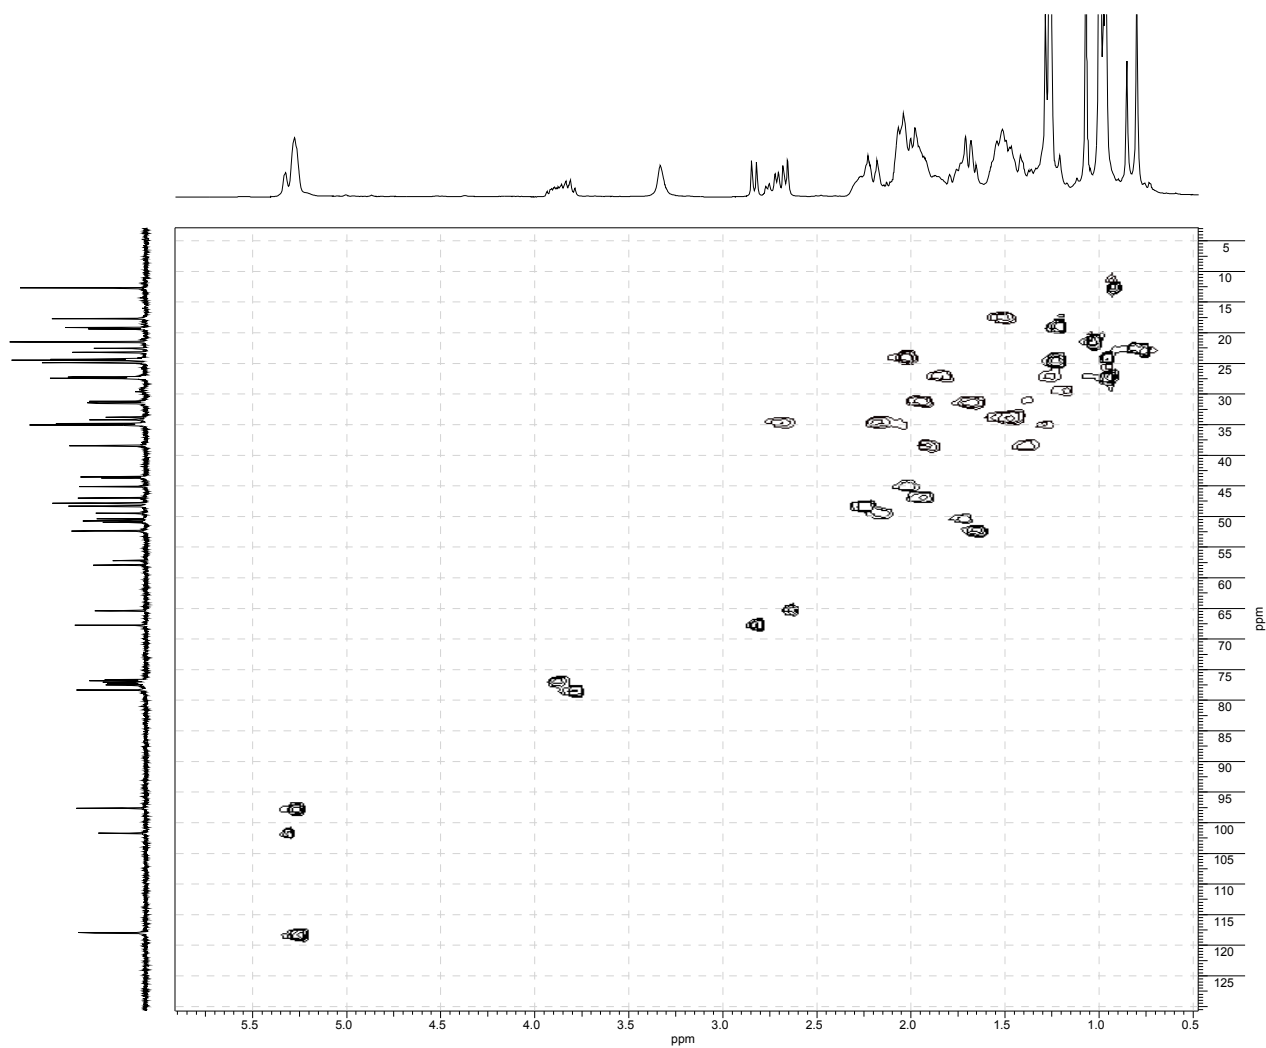

**Figure S20.** HSQC (300/75 MHz,  $\text{CDCl}_3$ ) of **3**.

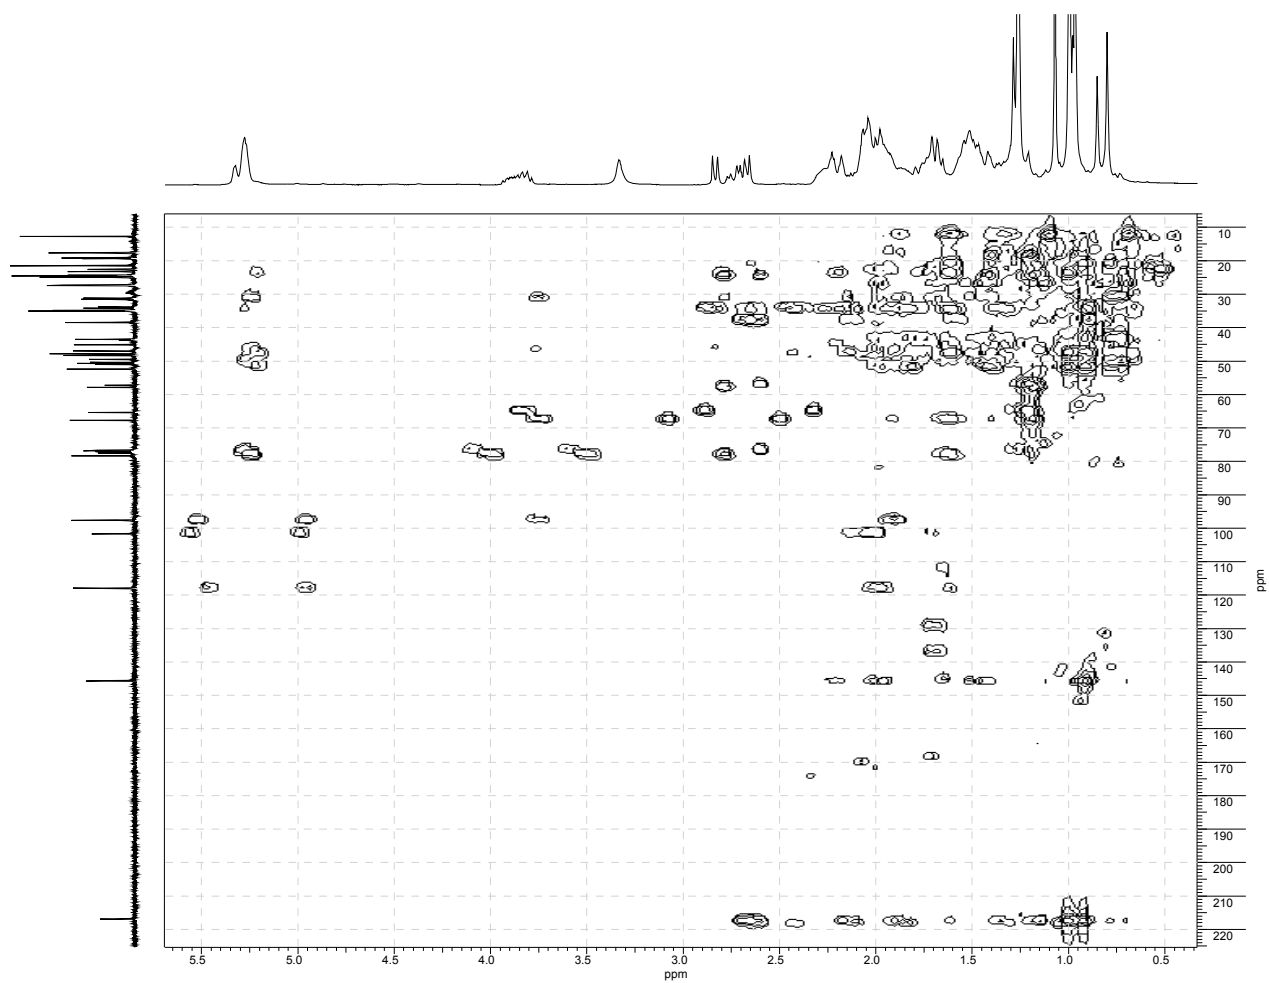

Figure S21. HMBC (300/75 MHz, CDCl<sub>3</sub>) of **3**.



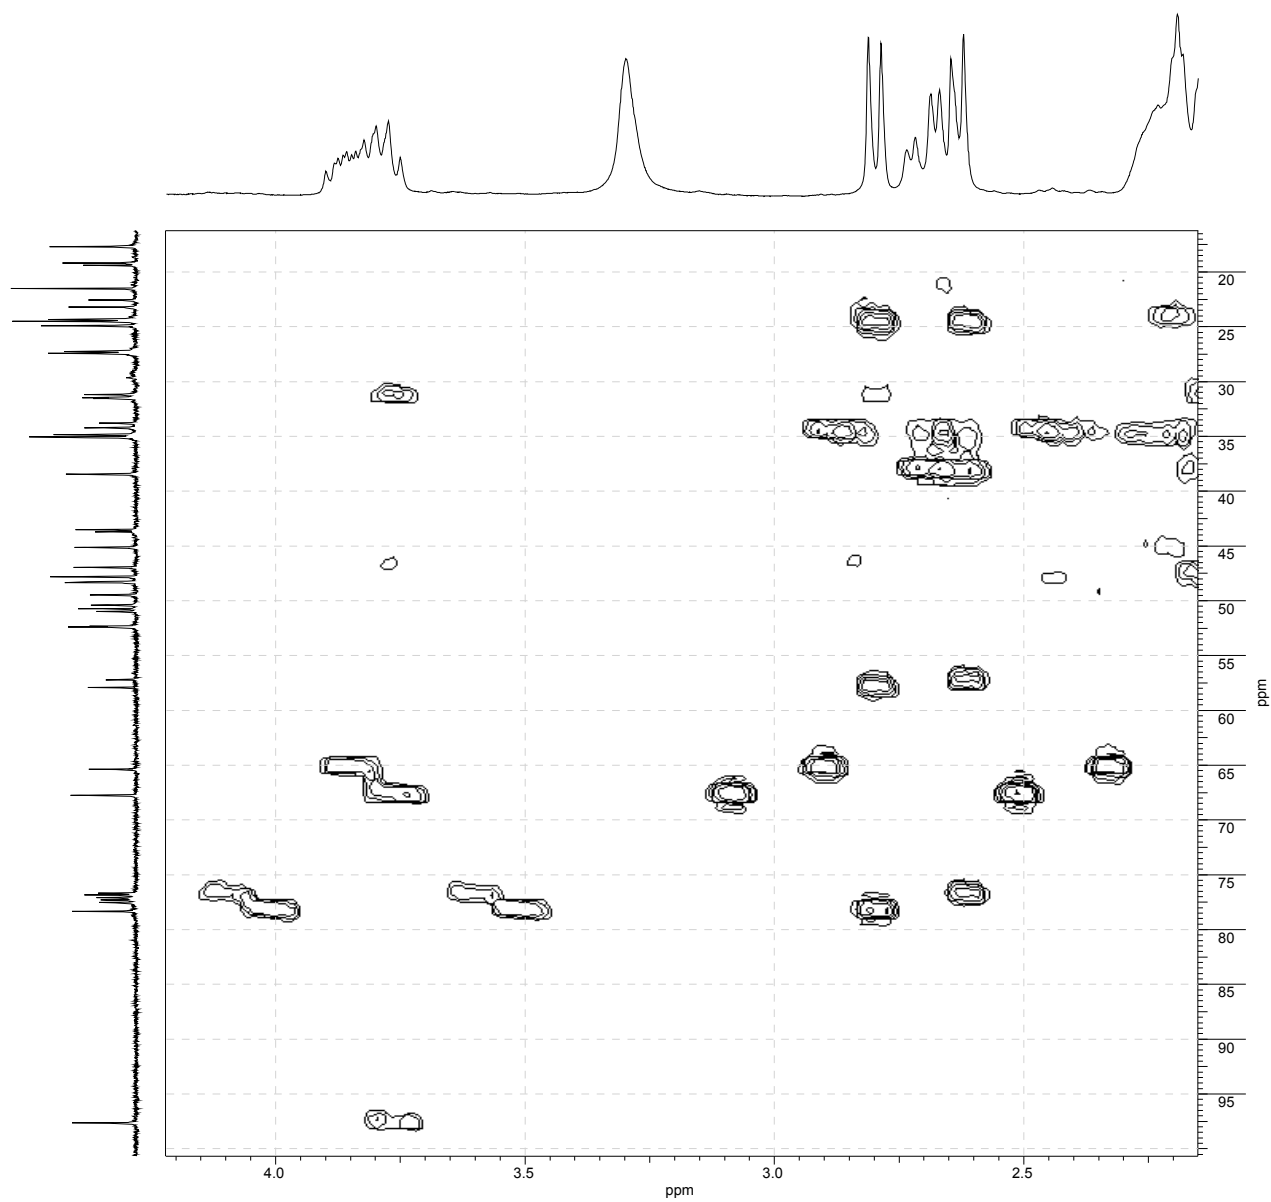

**Figure S22.** HMBC (300/75 MHz,  $\text{CDCl}_3$ ) [Expansion] of **3**.

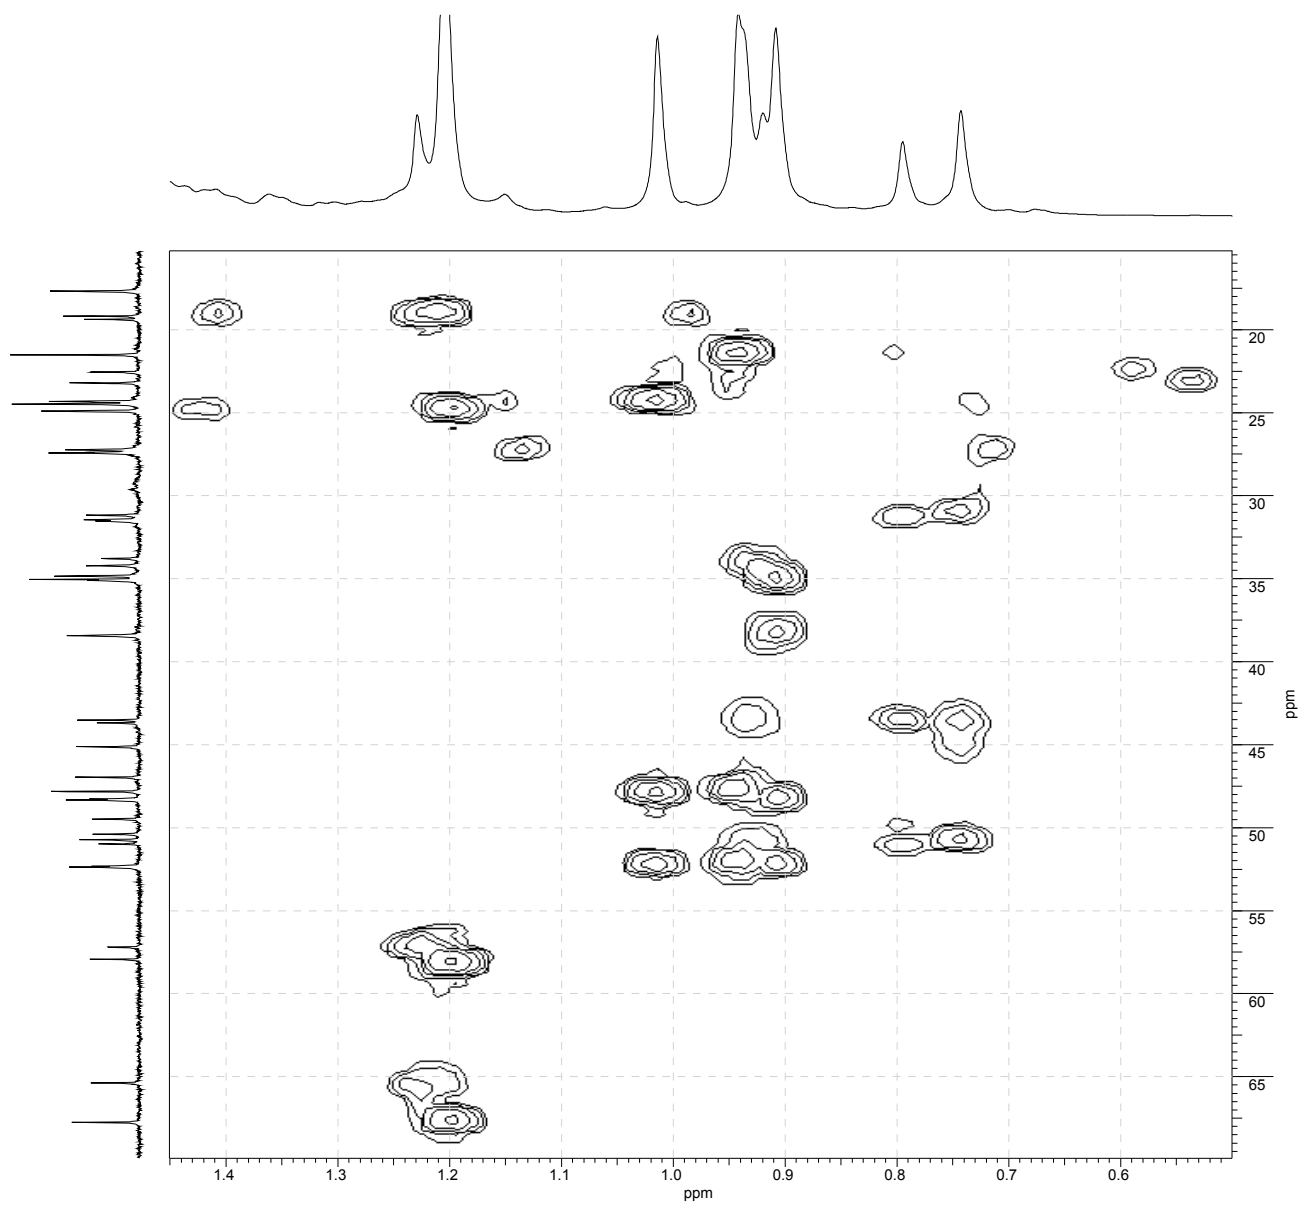

**Figure S23.** HMBC (300/75 MHz, CDCl<sub>3</sub>) [Expansion] of **3**.

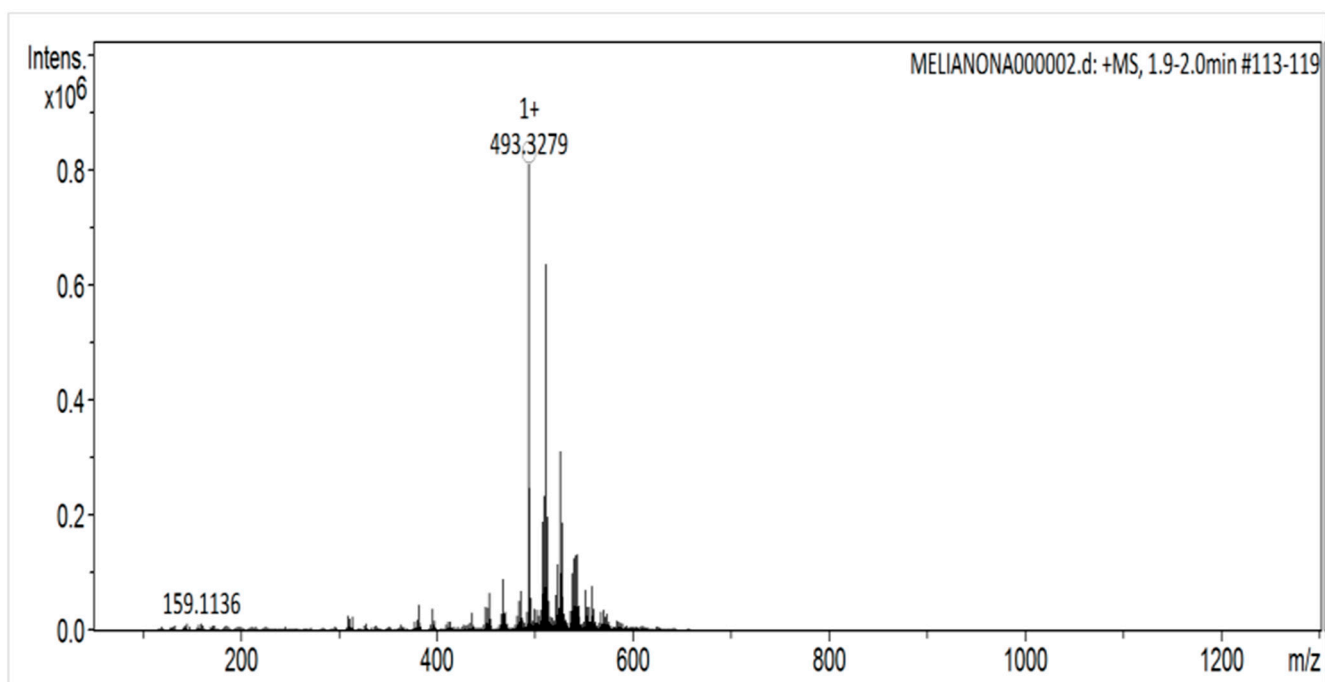

Figure S24. HRESIMS spectrum (positive mode) of **3**.

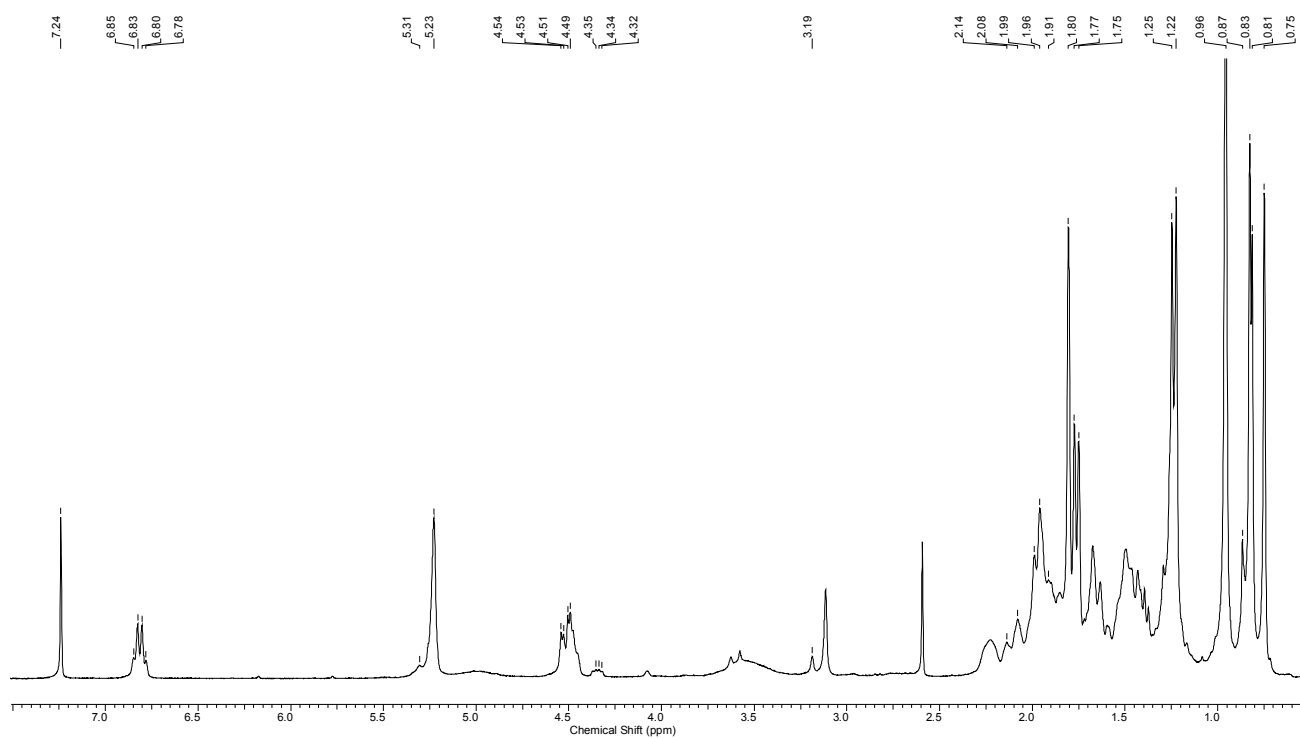

Figure S25. <sup>1</sup>H-NMR spectrum (300 MHz, CDCl<sub>3</sub>) of **4**.

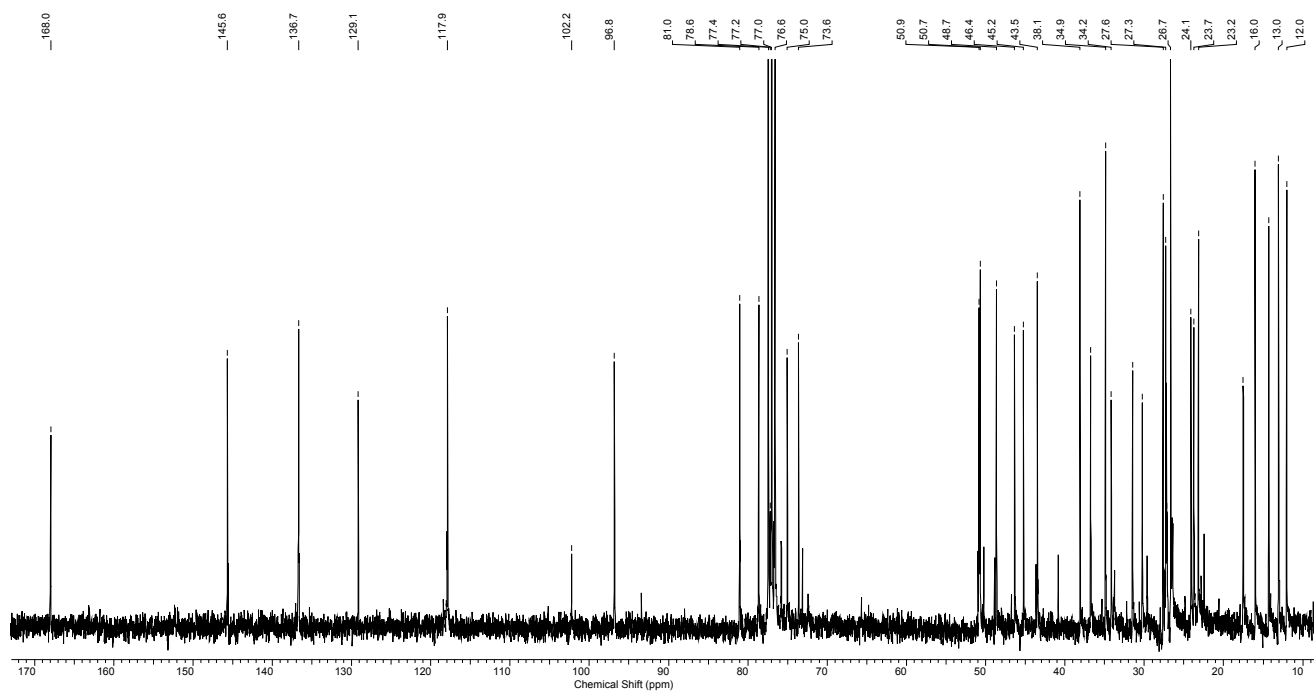

Figure S26. <sup>13</sup>C-NMR spectrum (75 MHz, CDCl<sub>3</sub>) of 4.

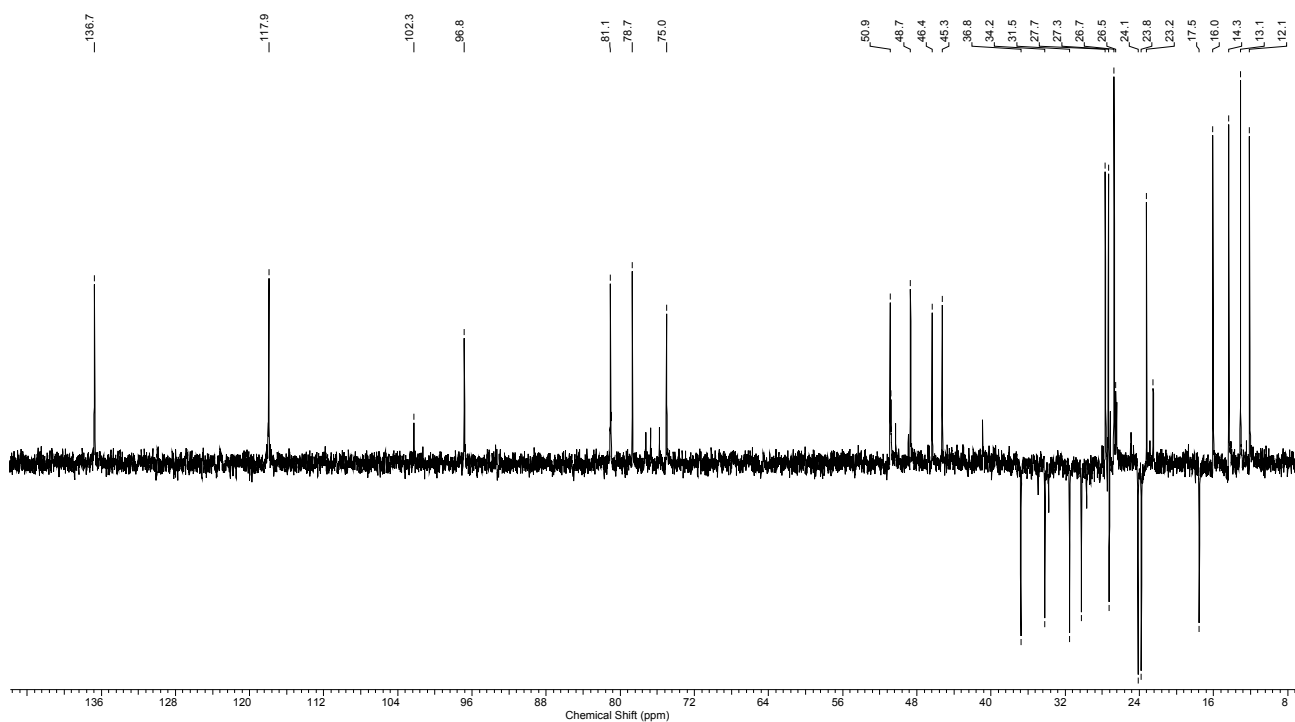

Figure S27. NMR DEPT 135 spectrum (75 MHz, CDCl<sub>3</sub>) of 4.

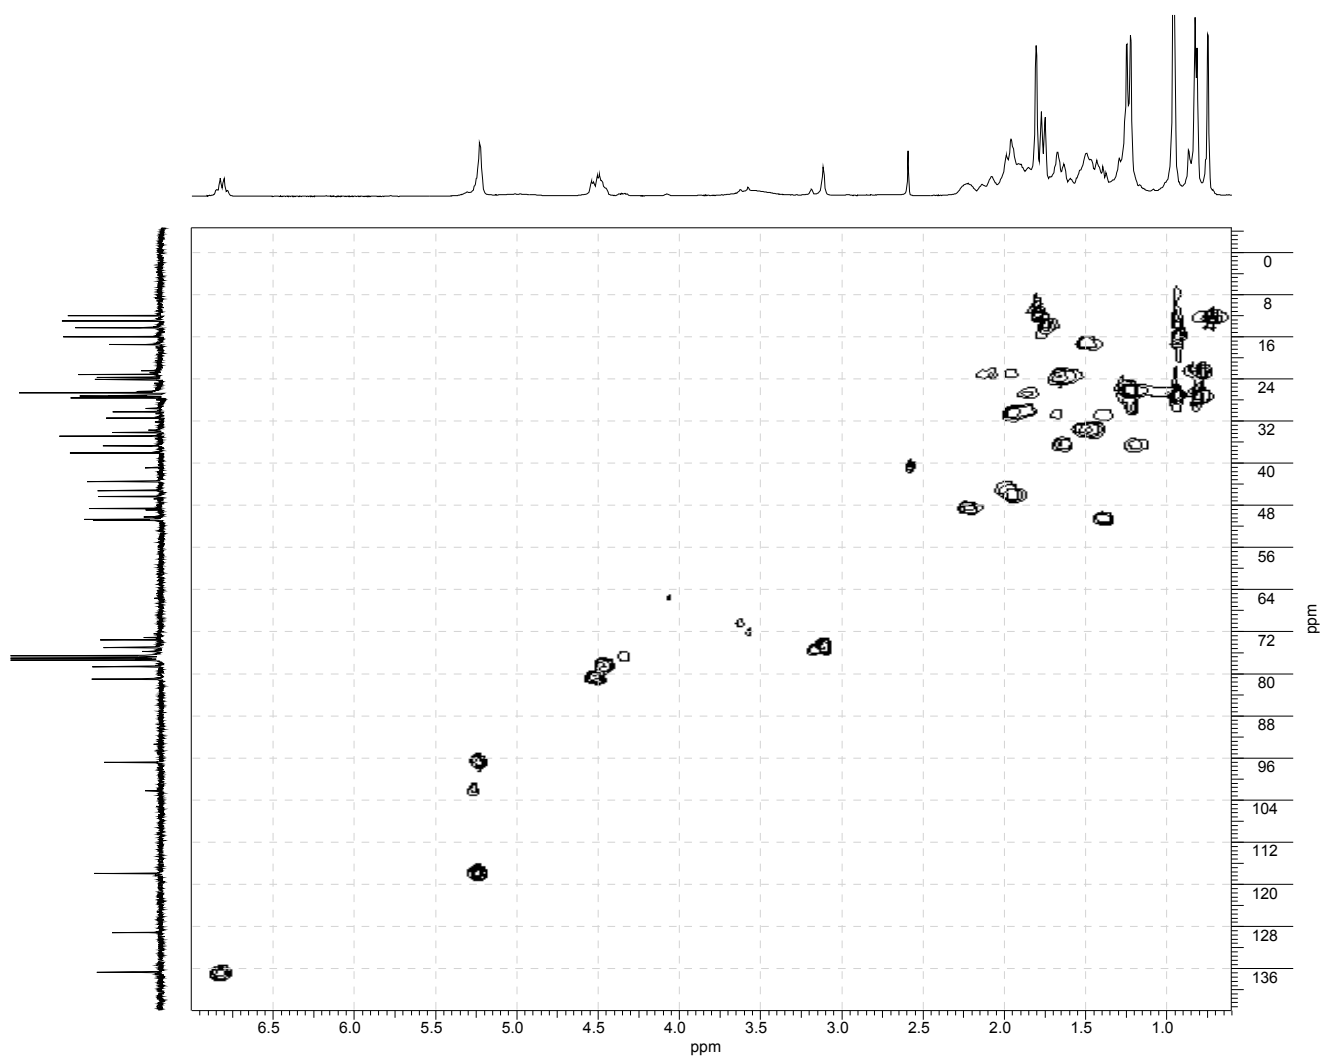

Figure S28. HSQC (300/75 MHz,  $\text{CDCl}_3$ ) of 4.

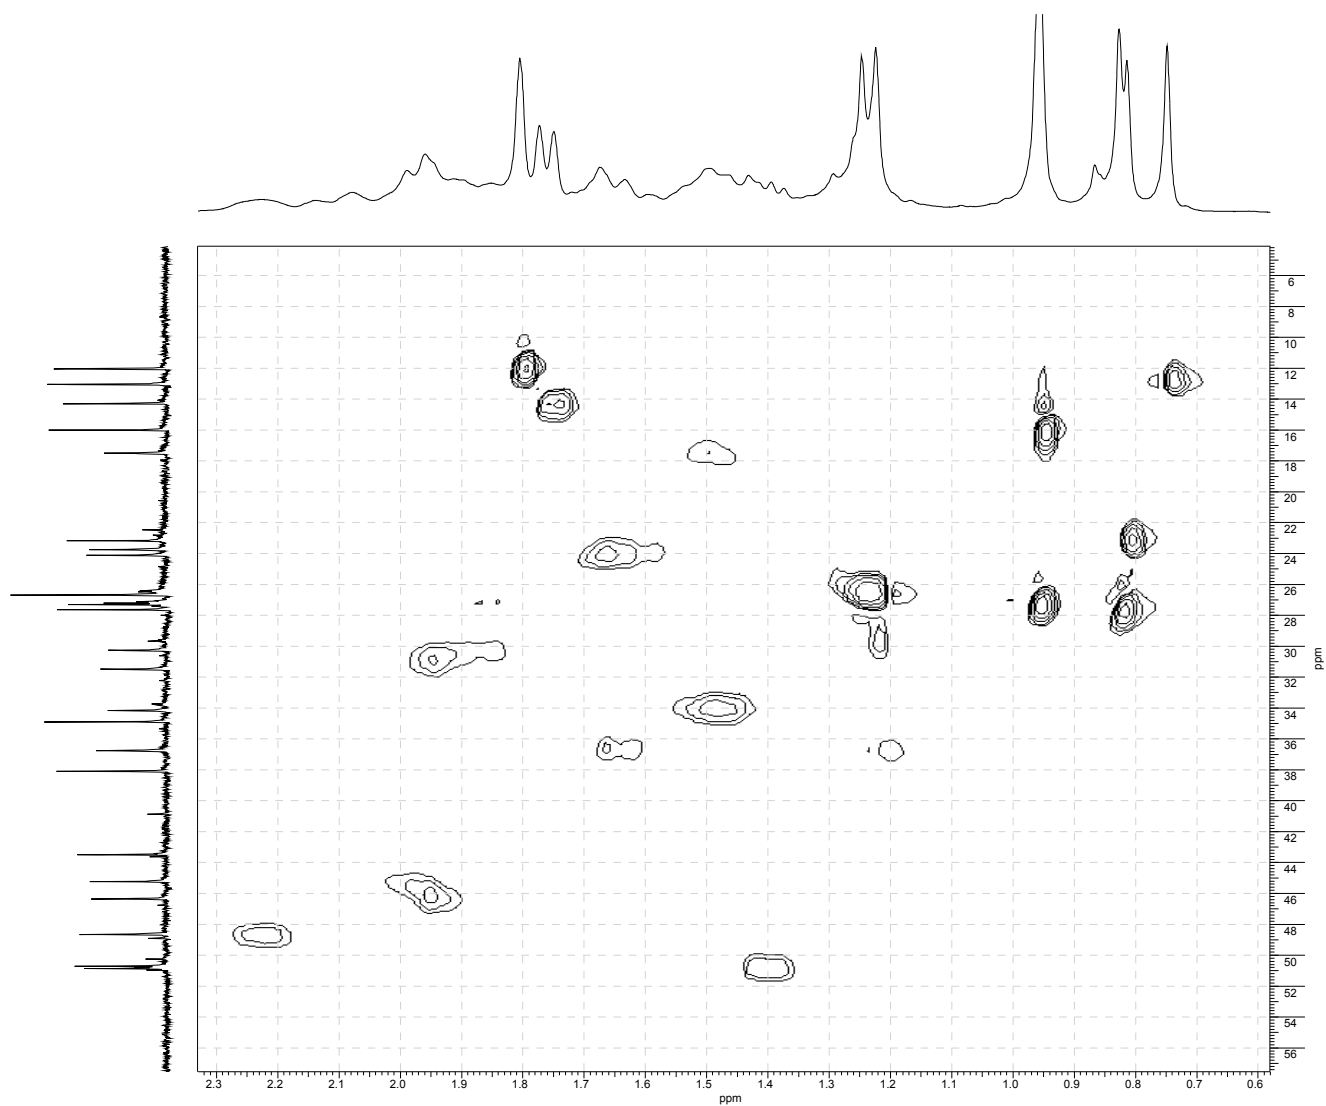

**Figure S29.** HSQC (300/75 MHz,  $\text{CDCl}_3$ ) [Expansion] of 4.

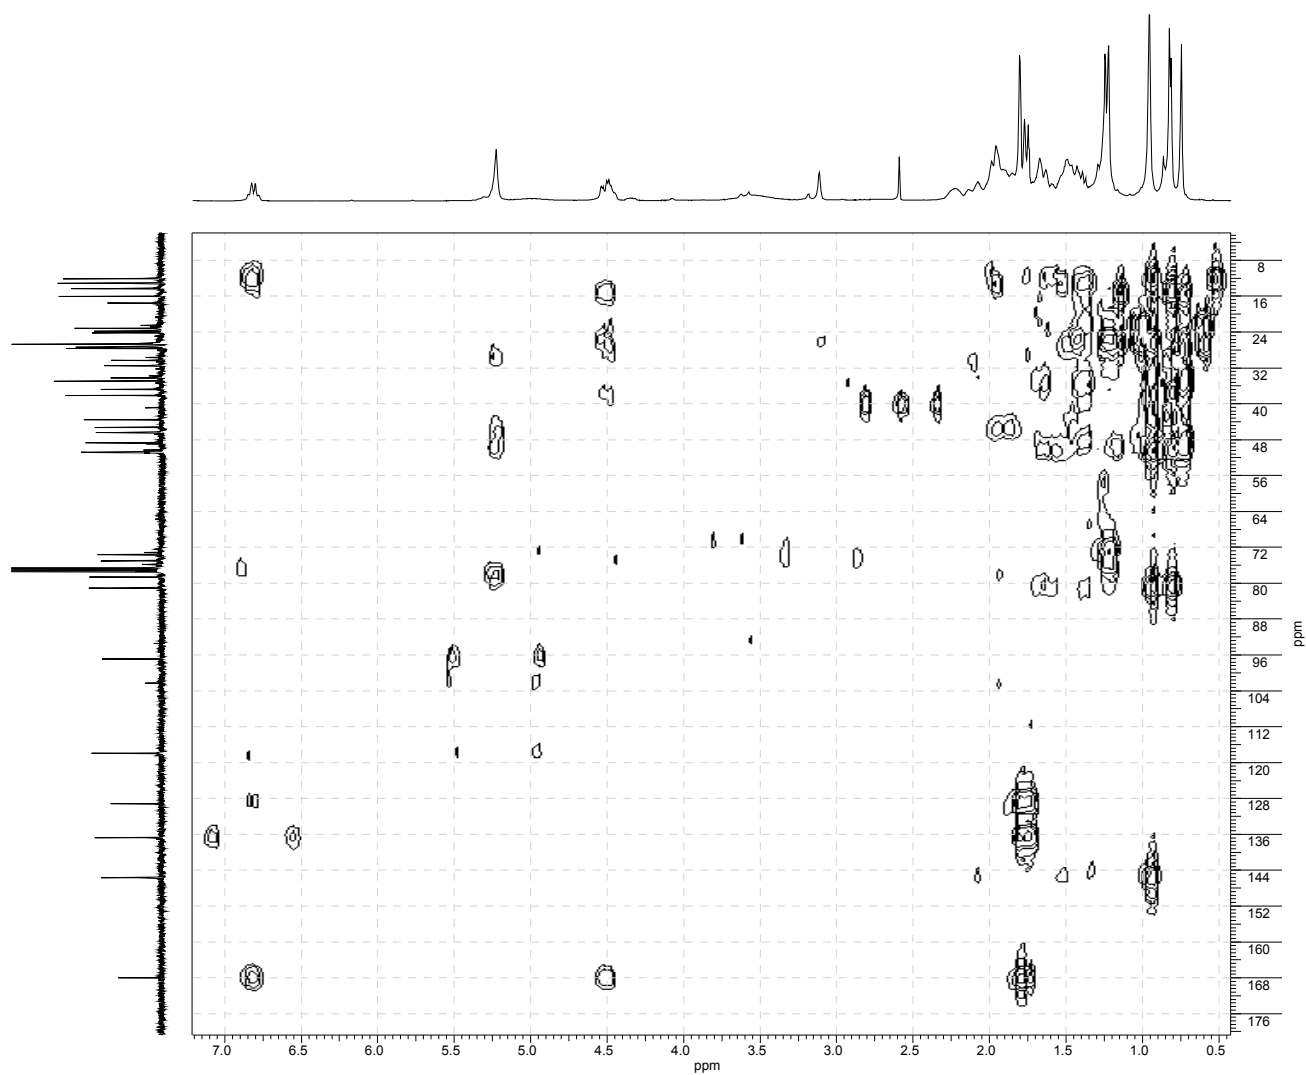

**Figure S30.** HMBC (300/75 MHz,  $\text{CDCl}_3$ ) of **4**.

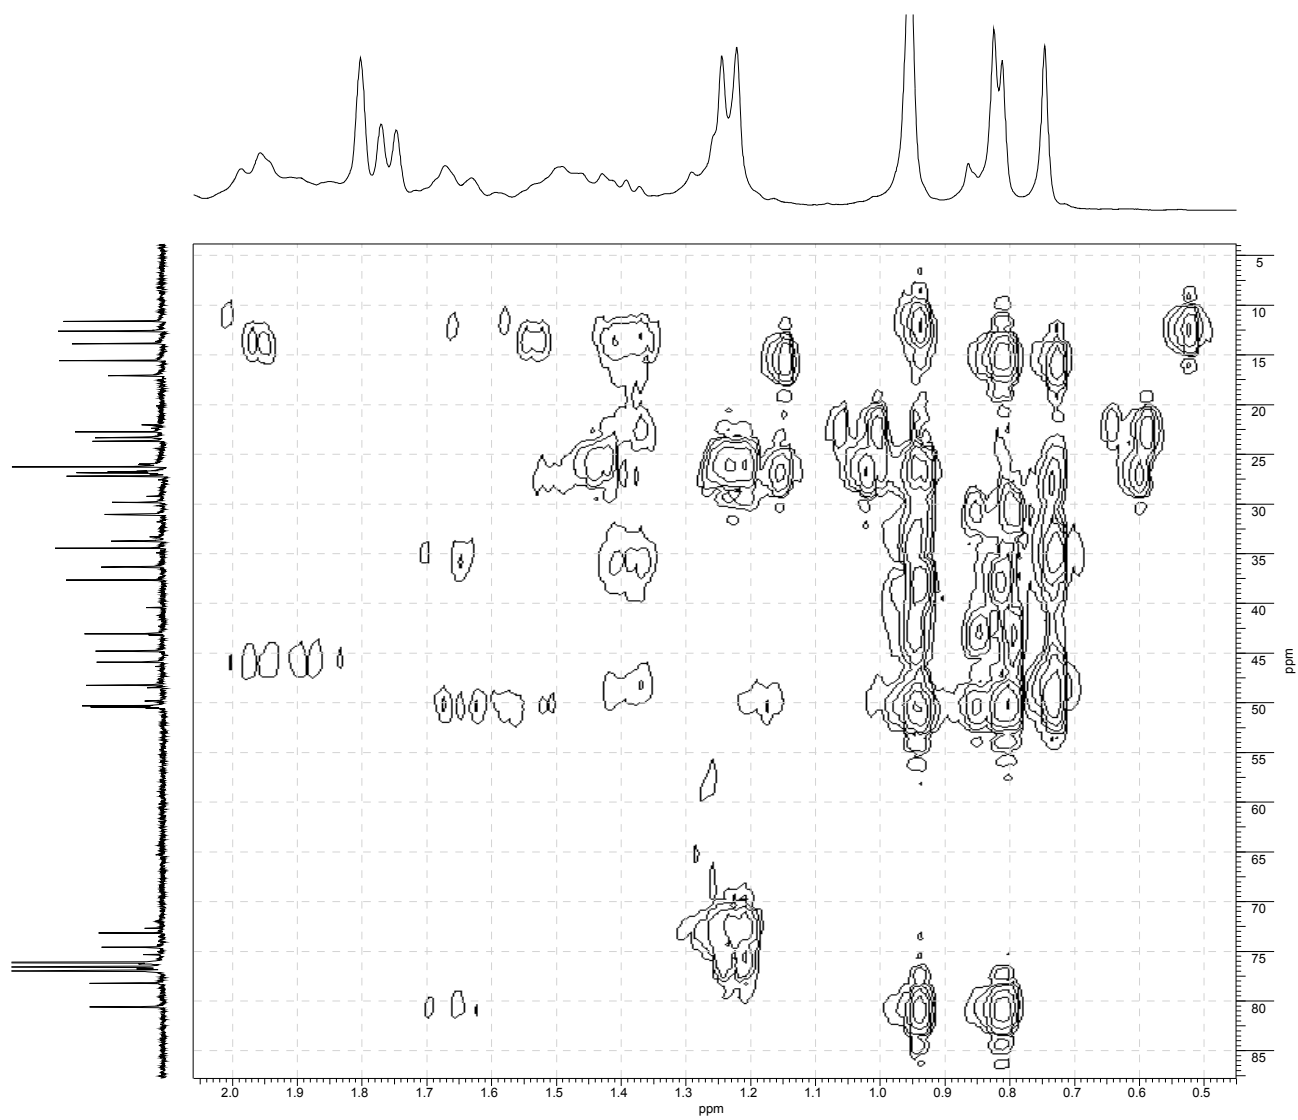

Figure S31. HMBC (300/75 MHz, CDCl<sub>3</sub>) [Expansion] of 4.



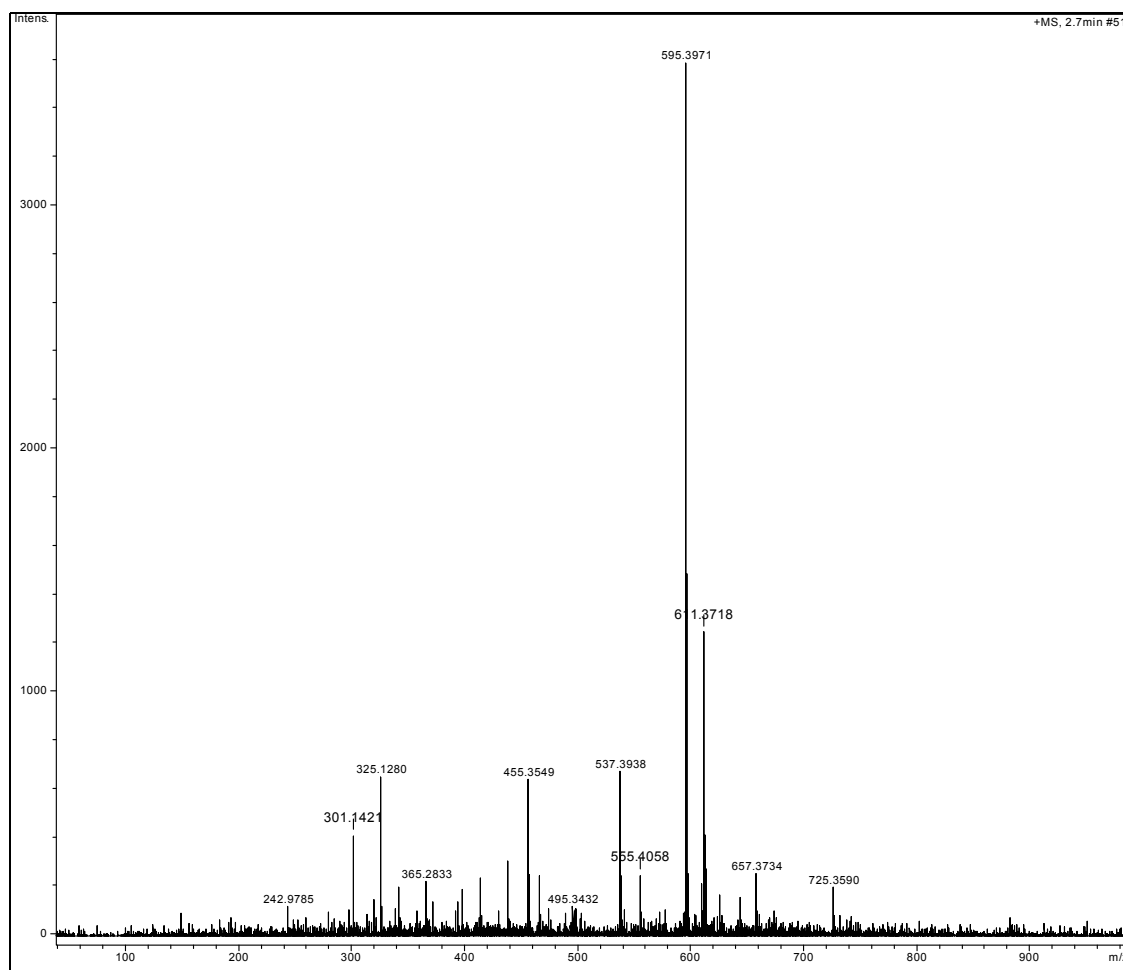

Figure S32. HRESIMS spectrum (positive mode) of 4.

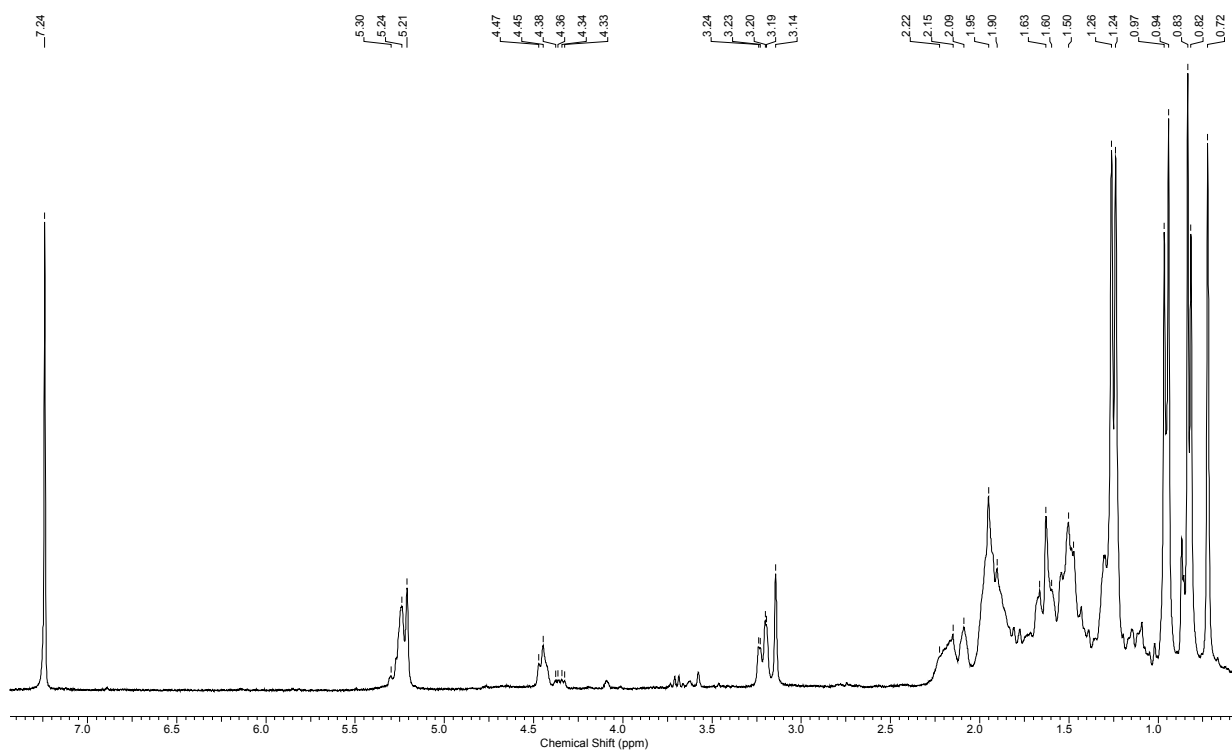

Figure S33.  $^1\text{H-NMR}$  spectrum (300 MHz,  $\text{CDCl}_3$ ) of 5.

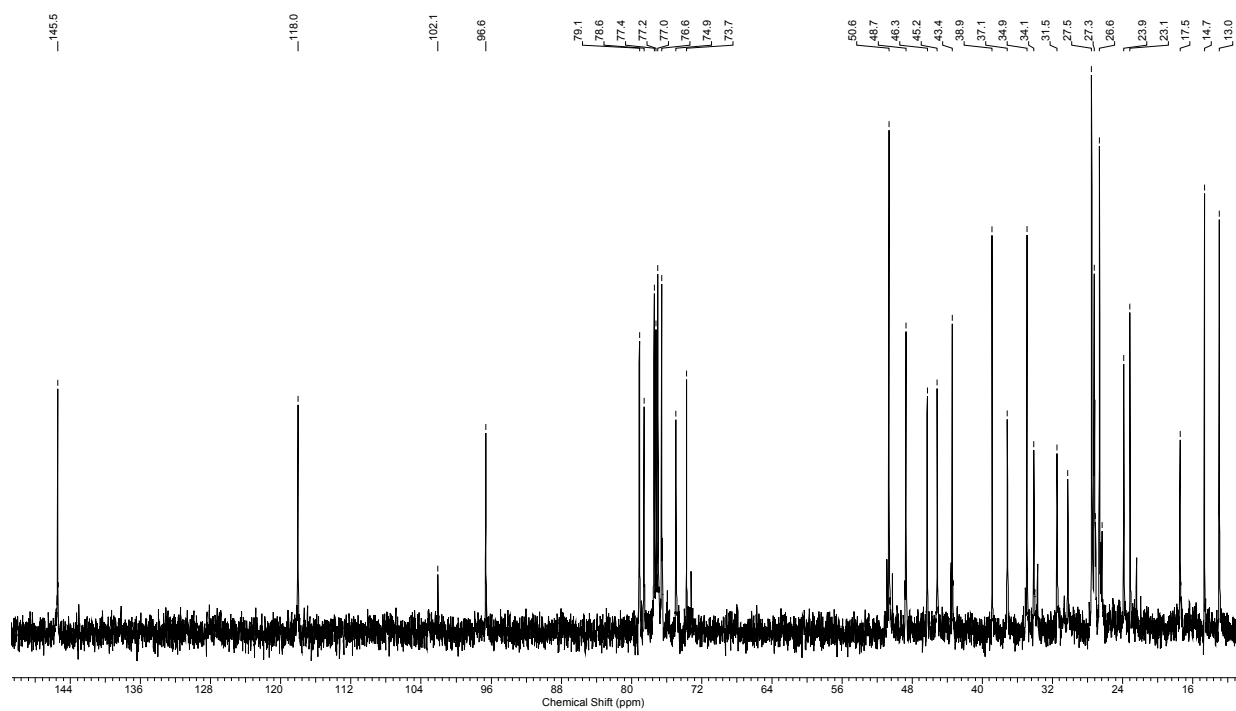

Figure S34.  $^{13}\text{C}$ -NMR spectrum of (75 MHz,  $\text{CDCl}_3$ ) **5**.

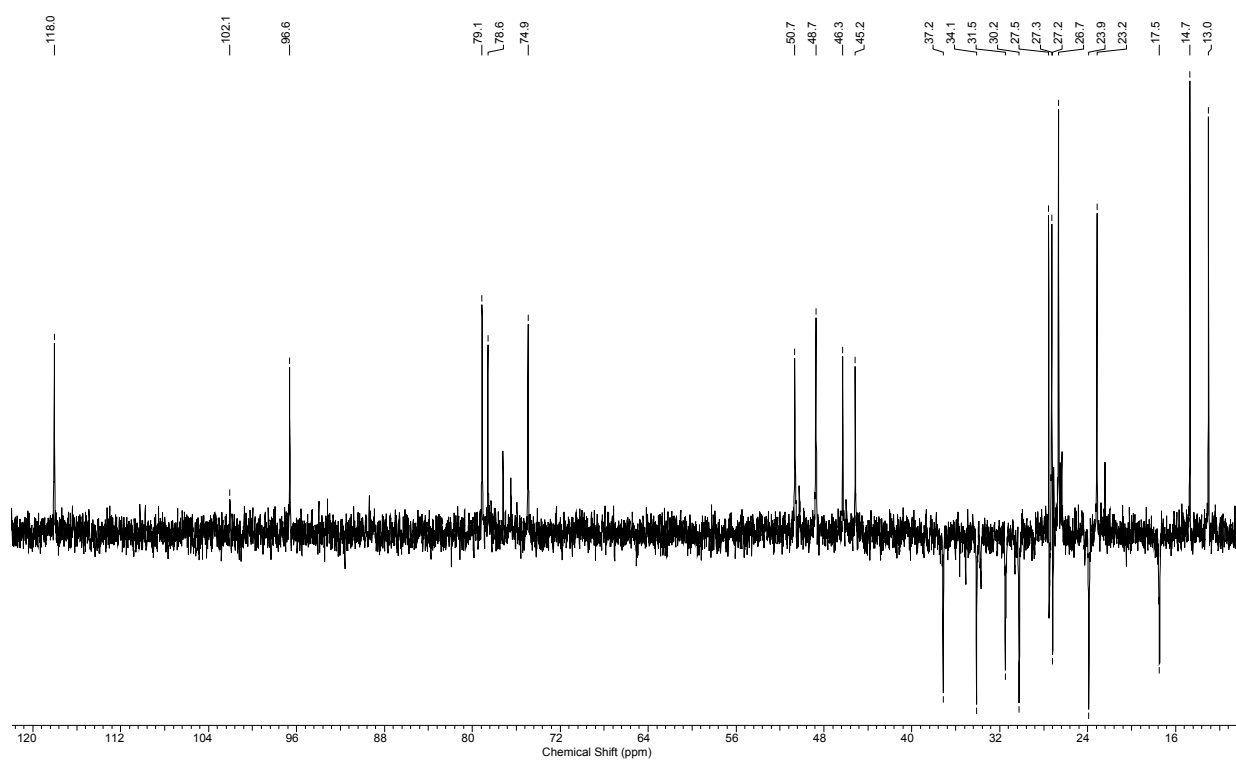

Figure S35. NMR DEPT 135 spectrum (75 MHz,  $\text{CDCl}_3$ ) of **5**.

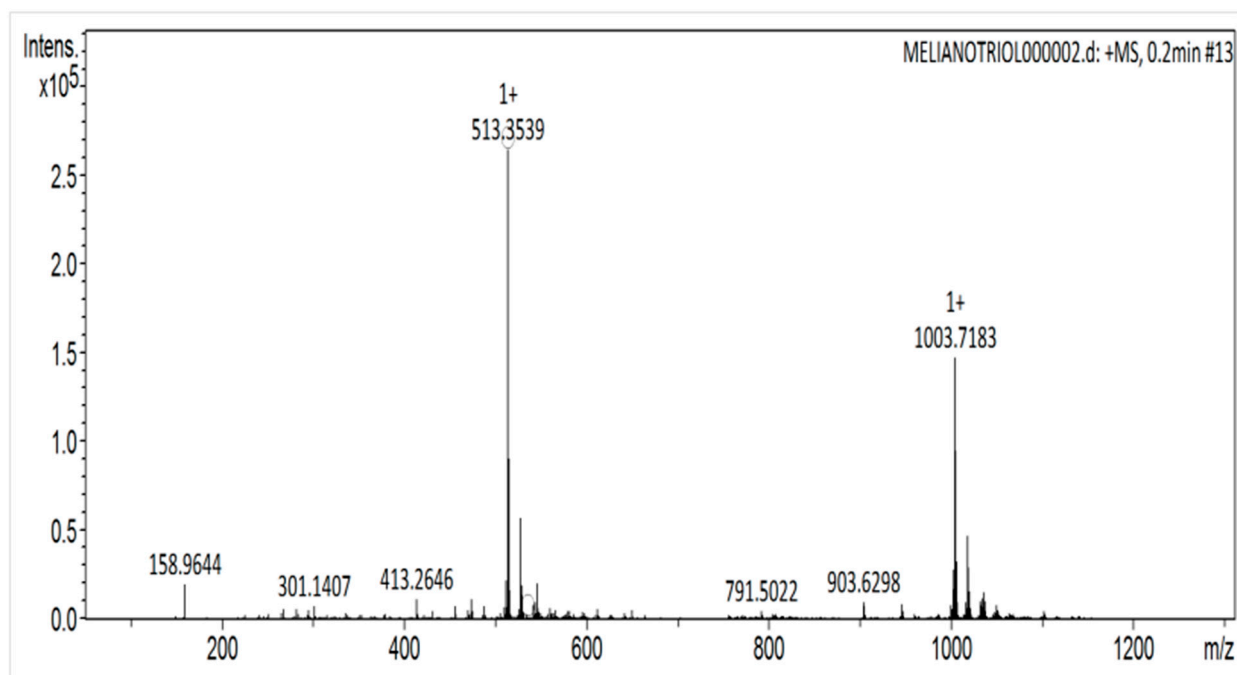

Figure S36. HRESIMS spectrum (positive mode) of **5**.

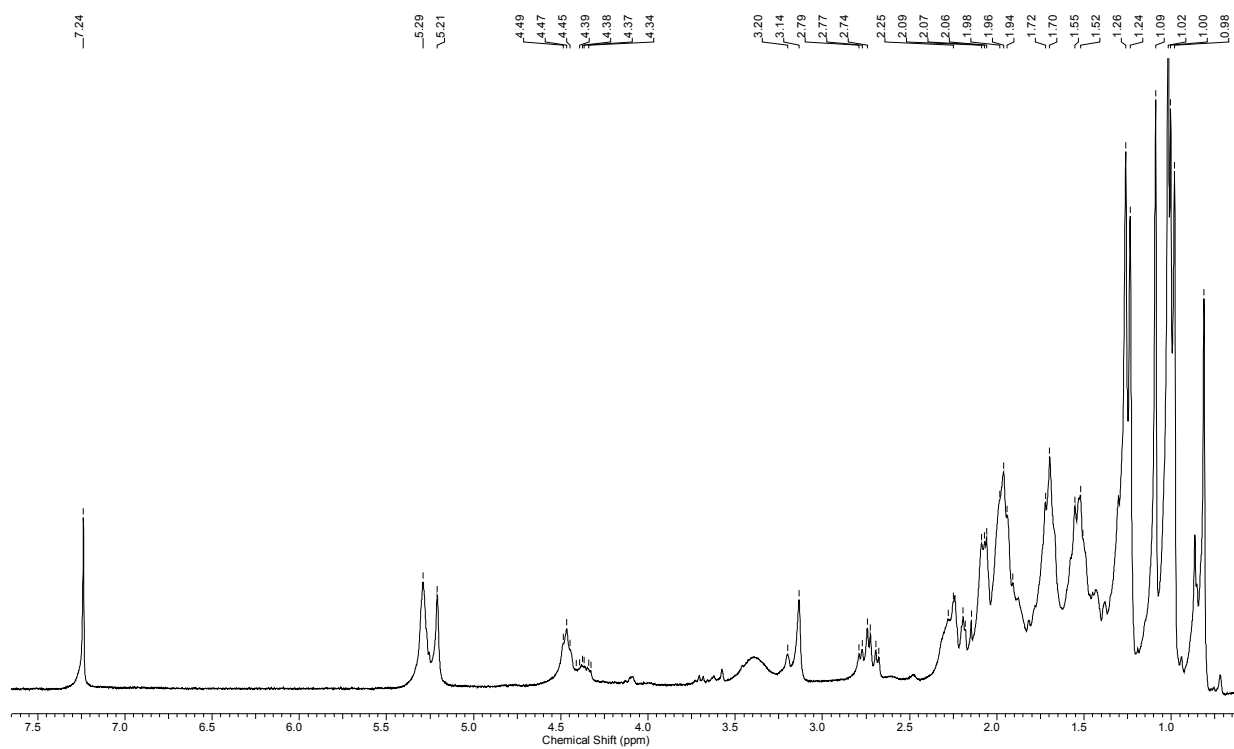

Figure S37. <sup>1</sup>H-NMR spectrum (300 MHz, CDCl<sub>3</sub>) of **6**.

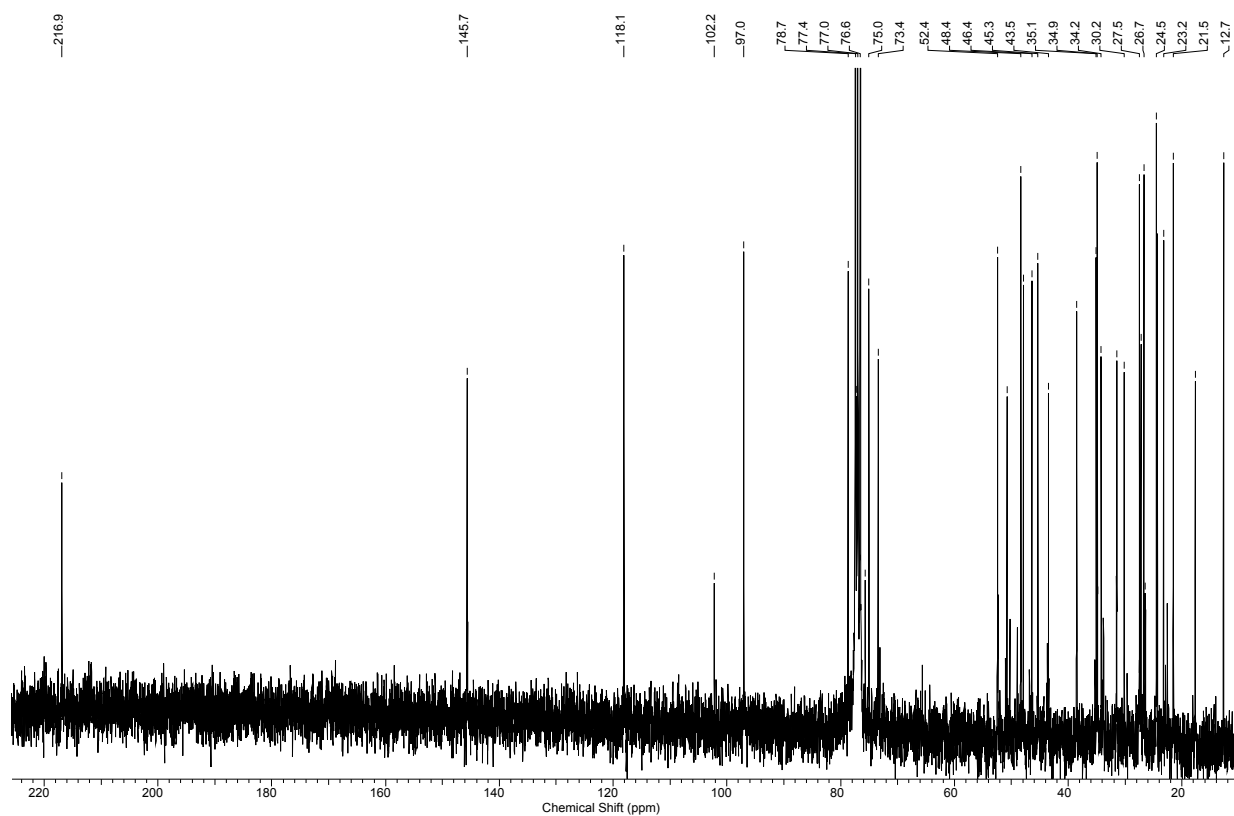

Figure S38.  $^{13}\text{C}$ -NMR spectrum of (75 MHz,  $\text{CDCl}_3$ ) **6**.

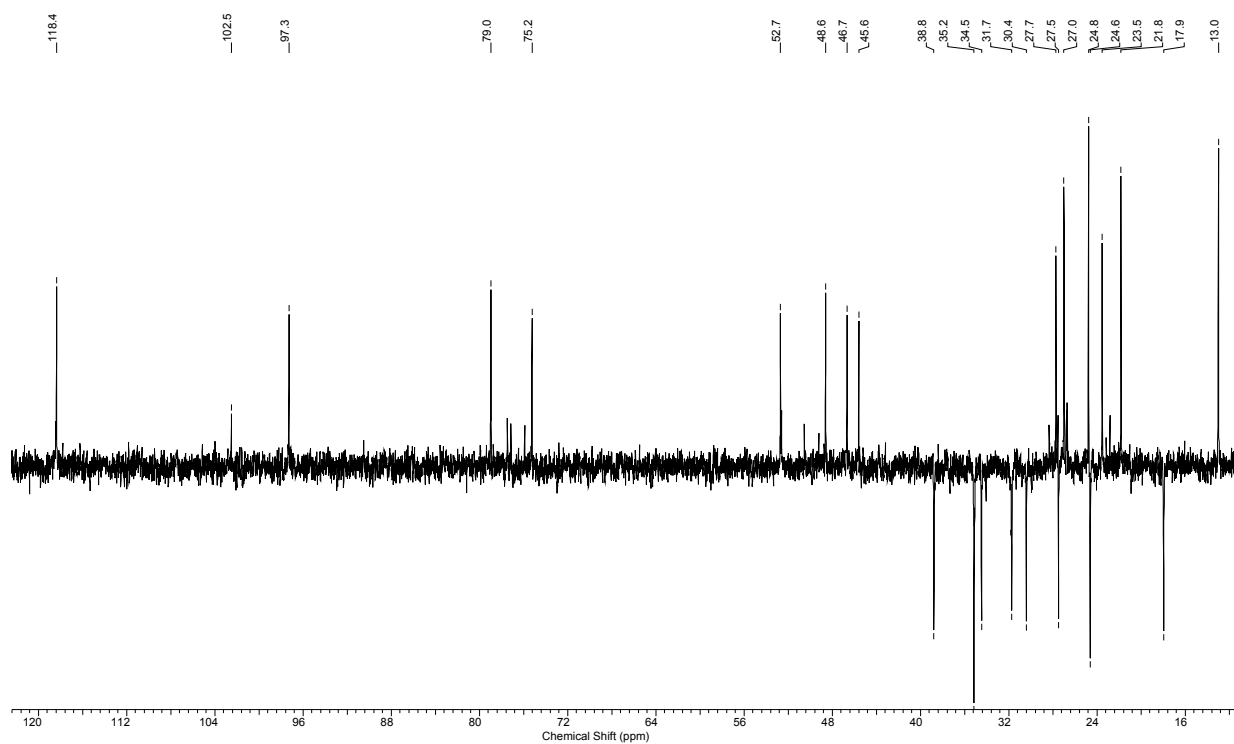

Figure S39. NMR DEPT 135 spectrum (75 MHz,  $\text{CDCl}_3$ ) of **6**.

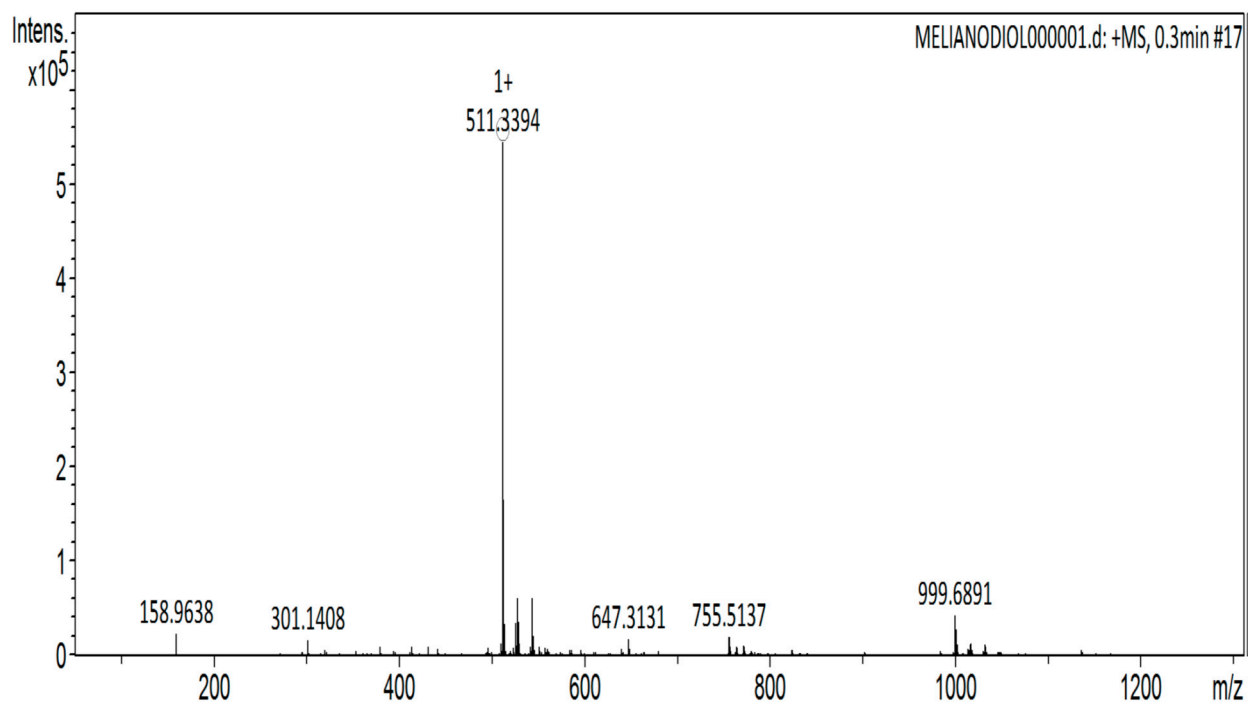

**Figure S40.** HRESIMS spectrum (positive mode) of **6**.
